# A HaloTag-TEV genetic cassette for mechanical phenotyping of native proteins

Jaime Andrés Rivas-Pardo<sup>1,5</sup>, Yong Li<sup>2</sup>, Zsolt Mártonfalvi<sup>3</sup>, Rafael Tapia-Rojo<sup>1</sup>, Andreas Unger<sup>2</sup>, Ángel Fernández-Trasancos<sup>4</sup>, Elías Herrero-Galán<sup>4</sup>, Diana Velázquez-Carreras<sup>4</sup>, Wolfgang A. Linke<sup>2,\*</sup>, Julio M. Fernández<sup>1,\*</sup>, Jorge Alegre-Cebollada<sup>4,\*</sup>

<sup>1</sup> Department of Biological Sciences, Columbia University, New York, USA

<sup>2</sup> Institute of Physiology II, University of Muenster, Muenster, Germany

<sup>3</sup> Department of Biophysics and Radiation Biology, Semmelweis University, Budapest, Hungary

<sup>4</sup> Centro Nacional de Investigaciones Cardiovasculares (CNIC), Madrid, Spain

<sup>5</sup> Current address: Departamento de Física, Facultad de Ciencias, Departamento de Biología, Facultad de Química y Biología, Universidad de Santiago de Chile, Santiago, Chile

\* To whom correspondence should be addressed: [wlinke@uni-muenster.de](mailto:wlinke@uni-muenster.de); [jfernandez@columbia.edu](mailto:jfernandez@columbia.edu); [jalegre@cnic.es](mailto:jalegre@cnic.es) (@AlegreCebollada)

# **ABSTRACT**

Single-molecule methods using recombinant proteins have generated transformative hypotheses on how mechanical forces are generated and sensed in biological tissues. However, testing these mechanical hypotheses on native molecules in their natural environment remains inaccessible to conventional genetics, biophysics and molecular biology tools. To overcome these limitations, here we demonstrate a genetically engineered knock-in mouse model carrying a HaloTag-TEV insertion in the protein titin, the main determinant of myocyte stiffness. Using our system, we have specifically severed the titin filament by digestion with TEV protease, and found that the response of muscle fibers to length changes requires mechanical transduction through titin's intact polypeptide chain. HaloTag-based covalent tethering has enabled directed examination of the dynamics of native titin under physiological forces using recently developed magnetic tweezers. At physiological pulling forces lower than 10 pN, titin domains are readily recruited to the unfolded state, and produce 41.5 zJ mechanical work during refolding. Our results support an active role of titin in muscle contraction in coordination with actomyosin motors. Insertion of the HaloTag-TEV cassette in proteins with mechanical roles opens new grounds to explore the molecular basis of cellular force generation, mechanosensing and mechanotransduction.

# INTRODUCTION

The behavior of cells is decisively regulated by mechanical cues, which are generated, sensed and transduced by specialized proteins (1, 2). For example, integrin and talin transduce mechanical signals from the extracellular matrix into the cell through elastic structural domains that unfold and refold under force, leading to modulation of the binding affinity for downstream effectors (3, 4). The interplay between mechanical force and biology is even more apparent in cell types whose primary function is force generation, such as myocytes. These cells enable contraction of cardiac and skeletal muscle thanks to the activity of sarcomeres, which are highly organized protein structures that ensure efficient mechanical power delivery from arrays of actomyosin filaments (5). The giant protein titin is a fundamental component of sarcomeres, where it is continuously subject to end-to-end pulling force (**Figure 1A**). Spanning half the length of a sarcomere, titin sets the passive stiffness of myocytes and enables force transduction and coordination between sarcomeres (6, 7). As a result, titin is essential for the mechanical activity of striated muscle. Indeed, mutations in the titin gene are a major cause of heart disease and myopathies (8–12).

Single-molecule force-spectroscopy methods, in particular Atomic Force Microscopy (AFM), have been extensively used to examine the response to force of proteins with mechanical functions, including titin (13–16). These experiments have shown that proteins, when placed under a pulling force, unfold and refold according to their underlying free energy landscapes, which are highly force dependent (17–19). The fact that polypeptides are able to fold under load implies that they can generate mechanical work (19, 20). Indeed, the magnitude of mechanical work produced by titin folding has been proposed to be similar to the work delivered by the ATP-driven activity of myosin motors, a realization that has triggered the hypothesis that titin folding is an important contributor to active muscle contraction (21, 22). However, hypotheses like this are challenging to test experimentally due to the absence of methods to probe native protein mechanics.

Single-molecule methods involve purification of short, engineered recombinant proteins, which are exposed to pulling forces that can be far from the physiological range (23). To obtain functional insights, extrapolating models take into account physiological ranges of forces and actual protein sizes (13). However, these models are based on approximations whose validity is difficult to assess. Recent technological breakthroughs address some of these limitations. For instance, optical tweezers and magnetic-tweezers (MT)-based force-spectroscopy enable exquisite control of force at physiological ranges (24–26) and time scales (27). Still, the study of intact elastic proteins by single-molecule methods is limited due to the size of many of these proteins, ranging from 200 to 3700 kDa (28–31), which is challenging to reach by heterologous protein expression systems (13, 32–35). In addition, recombinant proteins do not contain native posttranslational modifications, which are key factors modulating the mechanical properties of proteins (36). Although proteins like titin can be purified from some natural sources and probed mechanically (14, 37, 38), not every tissue is suited for analysis due to limited purification yield. More importantly, controlling the pulling geometry in native proteins is not possible, which leads to ambiguous assignment of mechanical features (14, 26).

In this study, we develop a knock-in genetic cassette that enables controlled examination of the mechanical properties of native proteins. Our cassette includes a TEV protease recognition site and a HaloTag domain, which in combination allow protein labeling to assess cellular localization, polypeptide severing to probe mechanical function, and click-chemistry-based covalent anchoring for single-native-protein mechanical manipulation. We have used the HaloTag-TEV cassette to study titin (**Figure 1A**). Our results confirm that physiological forces readily recruit titin domains to the unfolded state in a reversible manner (26). We also demonstrate

that the mechanical folding of native titin is modulated across a wider range of forces than previously estimated using short, recombinant titin fragments. By specifically digesting native HaloTag-TEV titin with TEV protease, we have been able to quantify the contribution of titin to the overall stiffness of muscle fibers. We propose that the HaloTag-TEV cassette can be applied to examine the performance of a broad spectrum of native proteins with mechanical function.

## RESULTS

### Insertion of the HaloTag-TEV cassette in titin is well tolerated by mice

The I-band section of titin, containing up to 100 immunoglobulin-like (Ig) domains, is a major contributor to the passive stiffness of striated muscle tissue (6, 28, 39, 40). This segment includes an alternatively spliced region that provides titin with muscle-specific, tailored mechanical properties (7, 39, 41). To be able to study the mechanical role of titin's I-band in all striated muscles, we have introduced the HaloTag-TEV cassette in-frame between constitutively expressed exons 225 and 226. These exons code for Ig domains I86 (residues 14072-14157, UniProt A2ASS6-1) and I87 (residues 14161-14246) (**Figure 1A**, and **Supplementary Figure S1**) (7), which are located at the end of the I-band of titin. Homozygous and heterozygous animals for the HaloTag-TEV insertion are obtained at Mendelian rates (heterozygous crossing resulted in 24% wild-type, 49% heterozygous, and 27% homozygous mice, n=88). Both heterozygous and homozygous HaloTag-TEV-titin mice are fertile and appear as healthy as wild-type littermates.

The HaloTag domain enables click-chemistry reactions with chloroalkane ligands (42). We took advantage of this functionality to examine the expression and localization of the HaloTag-TEV construct in homozygous mice. We first incubated gastrocnemius muscle with Oregon Green HaloTag ligand, and visualized the sample by multiphoton, confocal and STED fluorescence microscopies after fixation and clarification of the tissue. We detected intense labeling in doublet stripes that are transversally oriented with respect to the long axis of the fibers in agreement with the engineered location of the HaloTag-TEV cassette (**Figure 1A, B, Supplementary Video S1**). To further characterize the position of the HaloTag-TEV cassette in the sarcomere, we isolated bundles of demembranated myofibrils from psoas muscle and co-stained them with Alexa 488 HaloTag ligand and Alexa 647-phalloidin (**Figure 1C**). Since phalloidin stains only naked actin, it can be used to determine the location of the Z-disk and the pointed ends of the thin filaments (43). As expected, the Z-disk, which is identified by the strongest phalloidin staining, appears between Alexa 488 doublets (**Figure 1C**). Equivalent results were obtained by observing sarcomeres directly under brightfield illumination using a spinning disk microscope (**Supplementary Figure S2**). Distances between fluorescent stripes were estimated from experiments with single myofibrils (**Figure 1D**). While the long distance between Alexa 488 stripes was always 1.5 - 1.6  $\mu\text{m}$ , in agreement with the constant length of murine A-band, the distances between Z-disks were quite variable reflecting the different contraction states of individual sarcomeres (**Figure 1E**) (44). We further verified the position of the HaloTag domain at the end of the I-band by nanogold electron microscopy (EM) using biotinylated halo-ligand, which was detected with gold-streptavidin (**Figure 1F**).

Taken together, our results show that the insertion of the HaloTag-TEV cassette in the titin gene is well tolerated in mice, and results in a functional HaloTag domain that localizes to the expected region of the sarcomere, both in skeletal and in cardiac tissue (**Supplementary Figure S3**).

## TEV-mediated polypeptide severing hinders titin mechanical function

The contribution of titin to the stiffness of muscle is usually considered to be prominent. This view is supported by experiments where harsh extraction methods are used to deplete titin from myocytes (39, 45). However, the specificity of these methods is limited since other cytoskeletal components can be affected, which can result in overestimation of the contribution of titin to muscle stiffness. The HaloTag-TEV cassette offers the opportunity to use the highly specific TEV protease to cleave a single peptide bond in titin (**Figure 2A**), resulting in cessation of force transduction through titin's polypeptide chain while preserving all other components in the myocyte.

To investigate whether specific severing of the titin filament is possible, we first purified a recombinant version of the HaloTag-TEV cassette flanked by Ig domains I86 and I87. The I86-HaloTag-TEV-I87 construct is readily digested by treatment with TEV protease (**Supplementary Figure S4**), confirming accessibility of the TEV site. We then incubated cardiac muscle from wild-type (WT) or homozygous HaloTag-TEV mice with TEV protease, and analyzed results using low-percentage acrylamide SDS-PAGE and Coomassie staining. The resulting pattern of titin bands is not affected by incubation with TEV when WT muscles are probed (**Figure 2B**). In these WT samples, low-electrophoretic-mobility bands corresponding to the N2BA and N2B titin isoforms (3.2-3.0 MDa) are identified along with T2 degradation products and/or the Cronos isoform of titin (39, 46). In contrast, TEV protease digestion of HaloTag-TEV muscle leads to the disappearance of the N2B and N2BA bands, which are replaced by three bands whose mobilities are in agreement with the expected 2.2 MDa size of titin's A-band/M-band region and the size of the Z-disk/I-band fragments originated from both the N2B and N2BA isoforms (**Figure 2B**). TEV-digestion experiments with skeletal muscles containing the long N2A titin isoform showed equivalent results (**Supplementary Figures S5, S6**). As a further proof of specific digestion, we incubated the samples with HaloTag Alexa488 ligand before electrophoresis. The only fluorescent band after digestion corresponds to the A-/M-band region of titin, in agreement with the relative position of the TEV site and the HaloTag in the cassette (**Supplementary Figure S5B**). Equivalent specific fluorescent labeling was also observed in digested I86-HaloTag-TEV-I87 recombinant protein (**Supplementary Figure S4**). Western blot analyses using MIR antibody, which targets titin's A-band (47, 48), further support specific digestion of HaloTag-TEV titin by TEV (**Supplementary Figure S5C**).

Having demonstrated TEV-mediated specific severing of HaloTag-TEV titin, we measured the stiffness of TEV-treated skeletal myofiber bundles by subjecting them to step increases in length and monitoring the resulting passive force. Treatment of HaloTag-TEV psoas myofibers with TEV resulted in a time-dependent drop in passive force of more than 50% (**Figure 2C, D**). This softening effect did not occur when WT myofibers were incubated with TEV, ruling out the potential contribution of off-target TEV sites (**Figure 2C, inset**). Further supporting the absence of relevant off-target sites, we did not find differences in the pattern of bands obtained in 12.5% SDS-PAGE following TEV treatment of muscle fibers, in conditions in which titin was readily cleaved (**Supplementary Figure S6**).

## The HaloTag-TEV cassette enables directed manipulation of single native titin molecules

The HaloTag domain has been used to covalently link short recombinant proteins to glass surfaces for single-molecule force-spectroscopy experiments (49, 50). We have extended this technology to native titin molecules extracted from HaloTag-TEV titin knock-in mice, and used recently developed high-resolution single-molecule MT to pull specifically the elastic I-band part of titin (**Figure 3**). To this end, we grabbed HaloTag-immobilized titin using paramagnetic beads coated with T12-antibody, which recognizes the first few proximal Ig domains in titin's I-band and has

been validated in optical tweezers experiments (26, 51, 52) (**Figure 3D**). In our MT setup, a pair of permanent magnets are brought in close proximity to the sample. As a result, a net constant magnetic pulling force is generated on anchored molecules. The resulting length of the tethered titin molecule is measured by comparing the position of the paramagnetic bead and a reference bead glued to the glass surface (24).

Three typical MT pulling recordings coming from single titin molecules isolated from different muscles are shown in **Figure 3E**. These traces, which are obtained at 19.7 pN, feature step increments in the length of the proteins that originate from mechanical unfolding of titin domains (26, 53). We measured the extension of the unfolding events at this pulling force, finding two major populations of step sizes at  $21 \pm 6$  and  $7 \pm 3$  nm (**Figure 3E**). An extension of 21 nm is compatible with full mechanical unfolding of Ig domains (14, 53). Shorter step sizes can originate from unfolding of disulfide-containing Ig domains (54, 55) or from domains unfolding through intermediates (56–58). These shorter unfolding steps represent ~12% of the total events detected in mechanical unfolding trajectories. We also detected occasional steps whose length is longer than theoretically allowed for single Ig domains. We interpret these steps as originating from two or more misfolded domains that exchange  $\beta$ -strands to complete the folded state (59–61). We measured how the size of the unfolding steps varies with force and found the typical scaling predicted by models of polymer elasticity. Using the worm-like chain model (62), we estimate that the contour length increments ( $\Delta L_c$ ) of the main unfolding populations of steps are  $30 \pm 1$  nm and  $14 \pm 1$  nm (**Supplementary Figure S7**).

All titin domains, including those belonging to the mechanically-silent A-band portion, unfold when placed under mechanical force (26). A specific feature of titin's I-band region is the presence of the PEVK and N2-Bus random coil regions (**Figure 3D**), which are characterized by low persistence/Kuhn lengths ( $kl < 2$  nm *versus* 20 nm for stretches of folded domains (13)). Hence, to show that our experiments are indeed probing specifically the I-band segment of titin, we estimated  $kl$  of our single-titin tethers. We measured the initial length before any unfolding event of gastrocnemius HaloTag-TEV titin at different forces. In these experiments, we subjected titin molecules to short pulses of forces between 1.1 and 87.7 pN, and then pulled at high forces to confirm formation of single-molecule tethers from the appearance of unfolding steps (**Figure 3G**). Fitting the data to the freely jointed chain model of polymer elasticity (63), we obtain  $kl = 1$  nm (**Figure 3H**), a typical value for random coil regions. Hence, the analysis of the initial lengths of single-protein tethers confirms specificity of HaloTag-mediated anchoring of the I-band region of titin.

### **Native titin molecules generate mechanical work through unfolding/folding transitions**

Taking advantage of the high stability and resolution of MT at low forces, we pulled the I-band of native HaloTag-TEV titin at physiological forces lower than 10 pN. These experiments conformed that these low forces are sufficient to recruit several Ig domains to the unfolded state in minutes (**Figure 3F**) (26). We also observed step decreases in length, which are caused by Ig-domain refolding events (21, 26).

Folding contractions against a pulling force generate mechanical work, which has been quantified before using short titin fragments (21). To inspect the range of forces at which native titin folding operates, we used triple force pulse experiments (**Figure 4A**). In these experiments, an initial *fingerprnt* pulse to high forces rapidly recruits Ig domains to the unfolded state. During the *refolding* pulse at low forces, folding contractions occur following elastic recoil of the polypeptide. A final *probe* pulse is used to quantify the number of domains that managed to refold

in the *refolding* pulse. In the trace in **Figure 4A**, 20 unfolding steps are recorded in the *probe* pulse (arrowheads). Folding of 20 Ig domains is expected to cause a 200-nm folding contraction at 5 pN since every unfolding domain contributes ~10 nm (**Supplementary Figure S7B**). This ~200 nm predicted contraction matches the observed folding contraction (**Figure 4A**), showing the robustness of the method.

To calculate the probability of folding at different forces, we set the force of the refolding pulse between 1 and 16 pN, and measured the ratio of unfolding domains observed in the *fingerprint* pulse vs those observed in the *probe* pulse. Long probe pulses over 300 s were used to ensure equilibrium. Compared to engineered Ig domains (21), the dependence of native titin's I-band folding with force is less cooperative (**Figure 4B**). Full folding only occurs at 1 pN, but some domains are able to fold against larger forces of up to 10 pN. The force at which the probability of folding is 0.5 is 6.5 pN, very similar to the value obtained using engineered Ig domains (21). We calculated the work delivered by folding considering the size of the refolding step at different pulling forces. We found that full-length Ig domain folding can generate up to 100 zJ mechanical work at the highest forces ~10 pN (**Figure 4C**). However, at these high forces, the folding probability is very low. By multiplying the work produced by folding by the folding probability, we obtain a more useful measurement of the average energy produced by the folding of a single titin domain, which we found to be 41.5 zJ (21).

## DISCUSSION

We have developed a HaloTag-TEV genetic cassette to enable mechanical manipulation of targeted native proteins. The cassette, which does not induce any striking phenotype when inserted in murine titin, includes a HaloTag module and a recognition site for the highly specific TEV protease. While the TEV site can be exploited to halt force transduction via specific proteolysis (**Figure 2**), the HaloTag-based covalent surface immobilization allows long attachment times required for in depth protein mechanical characterization by single-molecule force-spectroscopy (**Figures 3, 4**).

We have applied the HaloTag-TEV to probe the nanomechanics of the I-band region of native titin molecules at physiological forces below 20 pN. Previous approaches based on optical tweezers relied on non-specific tethering strategies (26, 64), so the geometry of the single-molecule tethers could not be controlled. As a consequence, those milestone experiments also probed the mechanically silent A-band section of titin, precluding robust assignment of mechanical unfolding and folding features to the functionally relevant I-band region. Using HaloTag for directed single-molecule tethering, we have confirmed that at physiological forces below 10 pN, domains belonging to the I-band of titin are readily and reversibly recruited to the unfolding state (**Figure 3F**) (13, 26). In this context, it will be interesting to explore whether recently described mechanical stabilization at low forces is a general feature of titin Ig domains (65).

To investigate the role of domain folding in active contraction, we have studied how the domains of native I-band titin are able to refold against varying pulling forces. We demonstrate that the force dependency of titin's folding is less cooperative than previously estimated using recombinant fragments (**Figure 4B**). We propose that this low cooperativity in native titin's mechanical folding can stem from heterogeneous mechanical properties of the multiple contributing Ig domains, but also to mechanically active posttranslational modifications that are not present in recombinant proteins. In any case, this low cooperativity comes with the advantage that titin can generate mechanical work at a wider range of forces than previously estimated (21).

The work generated by titin folding is of the same order of magnitude as the one generated by actomyosin motors (21). Hence, our results suggest that during the lengthening phase of muscle activity, titin Ig domains can be recruited to the unfolded state to store elastic energy, which can be delivered as productive work during contraction.

Our MT experiments show that a reduction in force leads to titin contraction by two independent mechanisms, i.e. fast elastic recoiling due to the entropic adjustment of polymer length and Ig folding. In the example shown in **Figure 4A**, the contribution of the elastic recoil predominates due to the abrupt change in force from 84.6 pN to 5 pN. However, the contribution of both factors is anticipated to be reverted *in vivo*, where changes in force acting on titin are calculated to be below 10 pN. Under such subtle changes in force, elastic recoiling is minimal; however, the folding ability of titin domains can vary dramatically (**Figure 4B**). Hence, titin folding contractions emerge as key transitions that not only set the stiffness of titin, but also titin's ability to produce mechanical work. Indeed, we speculate that the work produced by folding domains can be largely regulated by muscle chaperones (66–68), molecular crowding (69), or post-translational modifications (36, 70, 71).

Force transduction through proteins requires covalent continuity throughout the polypeptide chain. We have demonstrated that the HaloTag-TEV cassette can be used to examine the mechanical function of native proteins in the context of a tissue by specifically cleaving a single peptide bond. Previous approaches to interfere with the mechanics of proteins in tissues involve the use of non-specific proteases (39), harsh protein extraction protocols (39), or radiation (45), whose non-specific effects are difficult to assess. Our specific titin-severing experiments show that force transduction along the titin filament accounts for more than 50% of the stiffness of muscle fibers (**Figure 2 C, D**). The remaining stiffness is probably originated from other cytoskeletal components, such as microtubules (72), and the extracellular matrix (39).

In summary, we show that the HaloTag-TEV is a non-toxic genetic cassette that can be used to explore and interfere with the mechanical function of a native protein, while enabling precise fluorescent localization within tissues and cells. Indeed, the wide versatility of HaloTag-mediated click chemistry can give rise to biological insights beyond protein mechanics in the system of interest, including, but not limited to, characterization of protein-protein and protein-DNA interactions, and *in vivo* protein localization (73). We anticipate that the emergence of highly efficient genome-editing technologies (74) will boost insertion of the HaloTag-TEV cassette in different genes coding for mechanical proteins, and enable screenings for biomechanical functions of proteins. In this regard, the high performance HaloTag-based protein purification can make it possible to examine the mechanics of the many low-abundance proteins that are refractory to recombinant production (75).

# METHODS

**Animal experimentation.** All experimental procedures involving animals were done according to CU Institutional Animal Care and Use Committee, the *Area de Protección Animal de la Comunidad de Madrid* (PROEX 042/18) and the Animal Care and Use Committee of the University Clinic Muenster (A18.016). Mice were euthanized by cervical dislocation and deep-frozen in liquid N<sub>2</sub>. Tissue biopsies were preserved at -80°C until use.

**Generation of HaloTag-TEV titin knock-in mice.** The HaloTag-TEV cassette was inserted in the 3' end of titin's exon 225, which codes for the I86 domain (residues 14072-14157, UniProt A2ASS6-1). I86 is located at the end of the I-band of titin (**Figure 1 and Supplementary Figure S1**). The HaloTag-TEV cassette includes a copy of the HaloTag cDNA, which is preceded by a linker coding for a TEV site (**Supplementary Text S1**). The cassette also includes an enterokinase (EK) site following the HaloTag gene, which we have not used in this report. Our gene targeting strategy is based on homologous recombination, similar to previous modifications of the titin gene, *TTN* (44, 76). We used a Neomycin-resistance (neo) cassette that was modified to include the *TTN* gene region between exon 224 and 234 and the HaloTag-TEV cassette. Embryonic stem (ES) cells were transfected with the linearized targeting vector. Geneticin resistant colonies were screened for homologous recombination by PCR using primers *P1* and *PR2* (left arm), and *P2* and *PR3* (right arm) (**Supplementary Figure S1**). Double PCR-positive ES cells were used for blastocyst injection. Injected blastocysts were transferred to pseudopregnant mice. Chimera mice carrying the targeted allele were identified by PCR, confirming the presence of the left and right arms of the construction (**Supplementary Figure S1**). The neo cassette was removed by crossing heterozygous recombinant mice with Flp mice, which express the FRT-Flp recombination system. The offspring was screened by PCR using the *P<sub>min</sub>* and *PR<sub>min</sub>* primers (**Supplementary Figure S1**), which amplify a segment of the modified intron 225 (size of 175 bp in wild-type mice and 223 bp in knock-in mice). Mice were genotyped by PCR using the same set of primers *P<sub>min</sub>* and *PR<sub>min</sub>* (**Supplementary Figure S1**). Knock-in animals were generated by the Bio5 GEMMCore (University of Arizona).

**Fluorescence microscopy of intact muscle.** For intact muscle visualization, samples from homozygous HaloTag-TEV mice were incubated overnight with 5 μM HaloTag Oregon Green ligand (Promega) in PBS at 4°C in a rocking platform, and then fixed in 4% paraformaldehyde for 2 days at 4°C. After washing two times with PBS, 2-mm muscle slices were clarified using an X-Clarity system (Logos Biosystems). This protocol resulted in homogeneous labeling of muscle fibers, as observed by multiphoton microscopy (**Supplementary Video S1**). For multiphoton microscopy, we used a Zeiss LSM780 microscope coupled to an upright Axio Examiner Z1, a water dipping 20x plan-apochromat NA1 objective, and a Mai Tai DS 800 nm excitation laser (Spectra-Physics). For confocal and STED microscopies, we used a Leica SP8 gSTED 3D system coupled to an inverted DMI6000 microscope, and an HC PL Apo CS2 100x/1.4 oil objective. We excited at 496 nm and depletion was achieved using a 592 nm laser optimized for xy resolution.

**Light microscopy of isolated myofibrils.** Myofibrils from heterozygous and homozygous mice were isolated according to Linke *et al.* (77), leading to equivalent results. Briefly, 100 mg of muscle tissue was cut in ~1-2 mm<sup>3</sup> fragments and suspended in 500 μL rigor solution (10 mM Tris-HCl buffer pH 7.0, 75 mM KCl, 2mM MgCl<sub>2</sub> and 2 mM EGTA) supplemented with 10 μM leupeptin and 1 mM PMSF. Samples were demembranated by incubation with 1% Triton X-100 for 30 minutes at 4°C. After three washes in rigor buffer without detergent, tissues were homogenized using an ultra-turrax disperser (T25, IKA). The resulting suspension was kept in ice

for 15-30 min. Myofibrils were collected from the top of the suspension. 50-100  $\mu$ L of the myofibril-containing suspension were diluted three times in rigor buffer supplemented with 10  $\mu$ M leupeptin. For fluorescence microscopy, we added 10  $\mu$ M of HaloTag Alexa-488 ligand (Promega) and Alexa Fluor 647 phalloidin (Thermo Fisher) to a suspension of myofibrils, and incubation proceeded for 30 min at 4° C followed by three washes with rigor solution. For confocal and spinning disk imaging, myofibrils were deposited on a 35 or 50 mm glass fluorodish (MatTek Corporation) for 15 minutes, allowing the adhesion of the myofibrils on the surface. Myofibrils were imaged using a Leica TCS SP5 and SP7 confocal microscopes, using either 488 nm or 649 nm illumination laser with the proper set of filters. Images were analysed using Leica suited software and Image J.

**Nanogold electron microscopy.** 4% paraformaldehyde-fixed skeletal muscle samples of 16 week-old homozygous HaloTag-TEV mice were cut into longitudinal sections with a VT 1000S Leica vibratome (Mannheim, Germany) and rinsed twice in phosphate-buffered saline (PBS). To visualize the HaloTag *in situ*, samples were blocked in 20% normal goat serum (NGS) for 1 h and incubated with the HaloTag® Biotin Ligand (Promega, 200-fold dilution) in PBS supplemented with 5% NGS overnight at 4°C. The sections were then triple-washed with PBS and incubated with 1.4 nm gold-coupled Nanogold®-Streptavidin (Nanoprobes, Stony Brook, NY, USA) overnight at 4°C. After extensive washing, all sections were postfixed in 1% glutaraldehyde for 10 min and after rinsing, they were reacted with HQ Silver kit (Nanoprobes) to increase the apparent gold-particle diameter. After treatment with OsO<sub>4</sub>, samples were counterstained with uranyl acetate in 70% ethanol, dehydrated and embedded in Durcupan resin (Fluka, Switzerland). Resin blocks were made and ultrathin sections prepared with a Leica Ultracut S (Mannheim, Germany). Sections were adsorbed to glow-discharged Formvarcarbon-coated copper grids. Images were taken using a Zeiss LEO 910 electron microscope equipped with a TRS sharpeye CCD Camera (Troendle, Moorenwies, Germany).

**Native HaloTag-TEV-titin purification.** Titin molecules were purified using the method implemented by Soteriou *et al.* (78), adapted to mouse skeletal and cardiac tissue. Briefly, 100-200 mg of muscle tissue in small pieces of ~2 mm<sup>3</sup> were suspended in 600-1200  $\mu$ L of prechilled homogenization buffer (1 mM NaHCO<sub>3</sub> pH 7.0, 50 mM KCl, 5 mM EGTA, and 0.01 % NaN<sub>3</sub>), supplemented with protease inhibitors (1 mM PMSF, 40  $\mu$ g·mL<sup>-1</sup> leupeptin, 20  $\mu$ M E-64 and 20  $\mu$ g·mL<sup>-1</sup> trypsin inhibitor). Tissue was homogenized by three pulses of 8 seconds at 9000 rpm using an ultra-turrax dispenser (T25, IKA). The resulting suspension was washed four times with 300-600  $\mu$ L of homogenization buffer. Myofibrils were pelleted by centrifugation at 2000 g and 4°C. The pellet was suspended in 1 mL of prechilled extraction buffer (10 mM Imidazole pH 7.0, 900 mM KCl, 2 mM EGTA, 0.01 % NaN<sub>3</sub> and 2 mM MgCl<sub>2</sub>), supplemented with protease inhibitors (1.5 mM PMSF, 80  $\mu$ g·mL<sup>-1</sup> leupeptin, 40  $\mu$ M E-64 and 40  $\mu$ g·mL<sup>-1</sup> trypsin inhibitor), using plastic pellet pestles (Sigma-Aldrich). The extraction was conducted for 5 min on ice, followed by centrifugation at 20,000 g for 30 min at 4° C. The supernatant was diluted four times with pre-chilled precipitation buffer (0.1 mM NaHCO<sub>3</sub> pH 7.0, 0.1 mM EGTA, and 0.01 % NaN<sub>3</sub>) supplemented with 2  $\mu$ g·mL<sup>-1</sup> leupeptin. The solution was incubated for 1 hour in ice and centrifuged at 20,000 g for 30 min at 4° C to precipitate myosin. The supernatant, rich in titin molecules, was finally diluted with 5 volumes of the same precipitation buffer (supplemented with 2  $\mu$ g·mL<sup>-1</sup> leupeptin) to reach a final concentration of KCl of 0.045 M. After 40 min of incubation on ice, the solution was centrifuged at 10,000 g for 30 min at 4° C. The pellet of this last step contains the HaloTag-TEV titin molecules, which were suspended in ~500  $\mu$ L of 30 mM potassium phosphate buffer pH 7.0, 200 mM KCl and stored at 4 °C.

**TEV digestion assays.** TEV protease was produced from vector pMHT238Delta (79) or acquired commercially from ThermoFisher (AcTEV Protease) and used according to the manufacturer's instructions. A cDNA coding for the HaloTag-TEV cassette flanked by domains I86 and I87 was synthesized by Geneart (**Supplementary Text S2**), and was cloned in the *E. coli* expression vector pQE80 (Qiagen). Expression of TEV protease and I86-HaloTag-TEV-I87 was induced in BLR (DE3) cells at OD<sub>600</sub> = 0.6 – 1.0, using 1mM IPTG, 3h at 37°C, or with 0.4 mM IPTG overnight at 16°C, respectively. Proteins were purified by Ni-NTA and size-exclusion chromatographies and eluted in 10 mM Hepes, pH 7.2, 150 mM NaCl, 1 mM EDTA, as described (23). I86-HaloTag-TEV-I87 was stored at 4°C. TEV was stored at -80°C after addition of 10% glycerol. Digestion of I86-HaloTag-TEV-I87 by TEV was done in 10 mM Hepes, pH 7.2, 150 mM NaCl, 1 mM EDTA, 10% glycerol, 1 mM DTT. Before SDS-PAGE analysis, samples were incubated with 50 µM HaloTag Alexa488 ligand for 20 min in the dark. For digestion of titin in muscle samples, de-frosted muscle tissue was skinned in relaxing buffer (8 mM ATP, 20 mM imidazole, 4 mM EGTA, 12 mM magnesium propionate, 97 mM potassium propionate, pH 7.2) to which 0.5% Triton X-100 was added, overnight at 4°C. After extensive washing and centrifugation in relaxing buffer, samples were incubated in 100 µL relaxing buffer in the presence of 10 µl AcTEV protease (100 units), 7.5 µl TEV buffer 20x, 1.5 µl DTT 0.1 M, 31 µl relaxing buffer for up to 6 hours. For fluorescence detection of titin via the HaloTag, we added 10 µM of HaloTag Alexa-488 ligand (Promega) to a suspension of muscle tissue and incubated for 30 min at 4° C followed by three washes with relaxing solution. Samples were prepared for protein gel electrophoresis using published protocols (80). SDS-PAGE was carried out using the Laemmli buffer system in slab gels containing 12.5% polyacrylamide. For titin analysis, 1.8% SDS-PAGE was performed as described (80).

**Muscle fiber mechanics.** Using permeabilized skeletal myofiber bundles dissected from mice homozygous for HaloTag-TEV-titin, we measured passive force over the 2.2-3.4 µm sarcomere-length (SL) range. Force measurements were performed according to published protocols (39). Briefly, deep-frozen tissue was defrosted and skinned overnight in ice-cold low ionic-strength buffer (75 mM KCl, 10 mM Tris, 2 mM MgCl<sub>2</sub>, 2 mM EGTA, and 40 µg/ml protease inhibitor leupeptin, pH 7.2) supplemented with 0.5% Triton X-100. Under a binocular (Leica, Mannheim, Germany), small bundles of muscle fibers (diameter, 200-300 µm) were dissected and suspended between two mini forceps attached to a piezomotor and a force transducer (Scientific Instruments, Heidelberg, Germany). Force measurements were carried out in relaxing buffer (8 mM ATP, 20 mM imidazole, 4 mM EGTA, 12 mM magnesium propionate, 97 mM potassium propionate, pH 7.2) at room temperature. Stretching of the fibers was done stepwise from slack SL in 6 quick steps. Following each step the fiber was held at a constant length for 10 s to allow for stress relaxation. After the last step-hold, the fiber was released back to slack length. SL was measured by laser diffraction. After a rest time of 10 min, the measurement was repeated. Then, the fiber was treated with recombinant TEV protease for a duration of 30 to 120 minutes and the passive force-SL recordings were repeated at regular intervals. The TEV protease-containing buffer was prepared as follows: to 700 µl of relaxing buffer we added 70 µl AcTEV protease, 52.5 µl 20x TEV buffer, 10.5 µl 0.1 M DTT, and 217 µl relaxing buffer. For data analysis we considered only the peak force levels at the end of each step. For a given experiment, force was normalized to that measured before addition of TEV protease at 3.4 µm SL. Mean data points and SEM from n=6 experiments were calculated and fit with a simple polynomial.

**Force spectroscopy by magnetic-tweezers.** The experiments were carried out on halo-ligand fluid chambers, prepared according to published protocols (21, 24). Briefly, 3-aminopropyltrimethoxysilane amine (Sigma-Aldrich) is added to cleaned glass surfaces, followed by glutaraldehyde (Sigma-Aldrich) to crosslink the silane groups and the amine group of halo-ligand (HaloTag amine O4 ligand, Promega) (**Figure 3B**). T12-antibody-coated paramagnetic beads were incubated with native Halo-TEV-titin molecules, and then added into the fluid chamber. T12-coated beads were prepared according to Mártonfalvi *et al.* (26), including some modifications. Briefly, an aliquot of 100  $\mu\text{L}$  carboxylic acid paramagnetic Dynabeads M-270 (Invitrogen) and 10  $\mu\text{L}$  of 5  $\text{mg}\cdot\text{mL}^{-1}$  of protein A (Sigma-Aldrich), were added to 1 mL of 10  $\text{mg}\cdot\text{mL}^{-1}$  of N-(3-dimethylaminopropyl)-N'-ethylcarbodiimide hydrochloride (EDC, Sigma-Aldrich) dissolved in 100 mM sodium phosphate, pH 5.0 (2 hours at room temperature). Protein A-modified beads were recovered after centrifugation at 3000 g for 5 minutes at 4°C, and washed three times with 1 mL of 200 mM KCl + AB buffer (25 mM Imidazole pH 7.4, 25 mM KCl, 4 mM  $\text{MgCl}_2$ , 1 mM EGTA). Aliquots of 400  $\mu\text{L}$  of protein-A-modified beads were resuspended in 100 mM sodium borate buffer pH 8.2 (three washes). To coat the beads with the anti-titin antibody, 35  $\mu\text{L}$  of 1 mg/mL T12 antibody was added to the bead suspension (overnight incubation, 4°C). Protein A-T12-beads were washed three times with 800  $\mu\text{L}$  of 100 mM sodium borate buffer pH 8.2, and then transferred to 800  $\mu\text{L}$  of 200 mM triethanolamine pH 8.2. 1 mL of bead suspension was washed two times with 200 mM triethanolamine pH 8.2. Beads were then suspended in freshly prepared 50 mM dimethylpimelimidate (DMP) in 200 mM triethanolamine pH 8.2 (45 minutes at room temperature). Next, the beads were centrifuged and resuspended in 800  $\mu\text{L}$  of 50 mM ethanolamine pH 8.2 (5 min at room temperature). The beads were then suspended in 800  $\mu\text{L}$  of 100 mM sodium borate pH 8.2, followed by two washes with 800  $\mu\text{L}$  of 200 mM KCl + AB buffer. The beads were finally suspended in 400  $\mu\text{L}$  of 200 mM KCl + AB buffer, and could be stored at 4°C for weeks.

For MT experiments, 100  $\mu\text{L}$  of T12-coated paramagnetic beads were mixed with 400  $\mu\text{L}$  of blocking buffer (20 mM Tris-HCl pH 7.4, 150 mM NaCl, 2 mM  $\text{MgCl}_2$ , 0.01% sodium azide, and 1 % BSA). After overnight incubation at 4°C, the beads were centrifuged and washed three times in 200 mM KCl + AB buffer. Finally, 50  $\mu\text{L}$  of blocked T12-coated beads were incubated with 10-50  $\mu\text{L}$  of purified HaloTag-TEV titin for at least 1 hour. Then, the beads were suspended in 200 mM KCl + AB buffer and added to a Halo-ligand functionalized fluid chamber in the absence of magnetic field, as described before (21, 24). The beads were incubated on the surface during 1-5 minutes to achieve covalent binding between the HaloTag moiety and its ligand. 100  $\mu\text{L}$  of 200 mM KCl + AB buffer were added to wash out non-attached paramagnetic beads. During the pulling experiments, the position of the paramagnetic and reference beads was recorded, together with the position of the magnets (24). As reference beads, we used 3.57  $\mu\text{m}$  diameter amine bead (Spherotech) to ensure high length working range. For long-term experiments, the buffer was exchanged every ~1-2 hours or the fluid chambers were sealed to minimize buffer evaporation.

To measure folding probability, we used a multi-pulse force protocol, recruiting Ig domains to the unfolded state at high pulling forces and then relaxing to low forces to allow refolding (21). We calculated the folding probability by dividing the number of unfolding steps in the final probe pulse by the total Ig domains present in the initial fingerprint pulse. The work ( $W$ ) produced by folding events at each force was calculated considering the change in the end-to-end length of the folding Ig domain ( $x$ ) and the force ( $F$ ) at which the folding events occurs ( $W=F\cdot x$ ) (21, 22). To take into account that the probability of folding is strongly force-dependent, we determined the

expected work generated by titin by multiplying the produced work by the folding probability at each force (21).

To estimate the Kuhn length ( $kl$ ) of single titin tethers, we determined initial extensions before unfolding events at different forces. Our reference force was 1.1 pN, and the difference in length at increasing forces was measured. We estimated  $kl$  by fitting the freely jointed chain model (FJC) (63):

$$\Delta Length = L_C \cdot (\coth(F \cdot kl / k_B \cdot T) - k_B \cdot T / (F \cdot kl)) - L_C (\coth(1.1 \cdot kl / k_B \cdot T) - k_B \cdot T / (1.1 \cdot kl))$$

where  $L_C$  is the contour length of the molecule,  $F$  is the applied force,  $k_B$  is the Boltzmann constant, and  $T$  is the absolute temperature.

**Supplementary Information** is available in the online version of the article.

## Acknowledgments

This work was supported by the National Institutes of Health grants GM116122 and HL61228 (J.M.F.). J.A.R.P. acknowledges funding from CONICYT grant 11180705. J.A.C. acknowledges funding from the Ministerio de Ciencia, Innovación y Universidades (MCNU) through grants BIO2014-54768-P, BIO2017-83640-P, and RYC-2014-16604. The CNIC is supported by the MCNU and the Pro CNIC Foundation, and is a Severo Ochoa Center of Excellence (SEV-2015-0505). W.A.L. acknowledges funding from the German research Foundation (SFB1002, TPA08). J.A.C. and W.A.L. acknowledge funding from the European Research Area Network on Cardiovascular Disease through consortium MINOTAUR. M.Z. acknowledges funding from the National Research, Development and Innovation Office (NKFIH) through grants PD116558, FK128956, NVKP-16-1-2016-0017 and the Hungarian Academy of Sciences Bolyai grant. A.F.T. was the recipient of a travel fellowship from the Boehringer Ingelheim Fonds. We thank Consuelo Ibar (Rutgers University) for her help during the confocal measurements, and Dieter Fürst (University of Bonn) for providing the T12 titin antibody. We thank all the members of the Fernandez laboratory for their helpful discussions, and Natalia Vicente (through grant PEJ16/MED/TL-1593 from *Comunidad de Madrid*), CNIC's Microscopy Core Facility, and Marion von Frieling-Salewsky for excellent technical support.

## Author contributions

JARP, JAC and JMF conceived the project. JARP, JAC, WL and JMF designed research. JARP, EHG and JAC conducted light microscopy experiments. DVC and AFT conducted proteolysis experiments on recombinant proteins. YL conducted the muscle mechanics experiments and digestion of myofibrils. AU completed electron microscopy studies. JARP, RTR and ZM purified titin and did the magnetic tweezers experiments. JARP, JMF and JAC drafted the manuscript with input from all authors.

## Competing financial interests

The authors declare no competing financial interest.

# REFERENCES

1. Freikamp, A., Cost, A.-L., and Grashoff, C. (2016) The Piconewton Force Awakens: Quantifying Mechanics in Cells. *Trends Cell Biol.* **26**, 838–847
2. Yusko, E. C., and Asbury, C. L. (2014) Force is a signal that cells cannot ignore. *Mol. Biol. Cell.* **25**, 3717–3725
3. del Rio, A., Perez-Jimenez, R., Liu, R., Roca-Cusachs, P., Fernandez, J. M., and Sheetz, M. P. (2009) Stretching single talin rod molecules activates vinculin binding. *Science.* **323**, 638–641
4. Yan, J., Yao, M., Goult, B. T., and Sheetz, M. P. (2015) Talin Dependent Mechanosensitivity of Cell Focal Adhesions. *Cell. Mol. Bioeng.* **8**, 151–159
5. Szent-Györgyi, A. G. (2004) The Early History of the Biochemistry of Muscle Contraction. *J. Gen. Physiol.* **123**, 631–641
6. Linke, W. A., and Hamdani, N. (2014) Gigantic business: titin properties and function through thick and thin. *Circ. Res.* **114**, 1052–1068
7. Linke, W. A. (2018) Titin Gene and Protein Functions in Passive and Active Muscle. *Annu. Rev. Physiol.* **80**, 389–411
8. Taylor, M., Graw, S., Sinagra, G., Barnes, C., Slavov, D., Brun, F., Pinamonti, B., Salcedo, E. E., Sauer, W., Pyxaras, S., Anderson, B., Simon, B., Bogomolovas, J., Labeit, S., Granzier, H., and Mestroni, L. (2011) Genetic variation in titin in arrhythmogenic right ventricular cardiomyopathy-overlap syndromes. *Circulation.* **124**, 876–885
9. Herman, D. S., Lam, L., Taylor, M. R. G., Wang, L., Teekakirikul, P., Christodoulou, D., Conner, L., DePalma, S. R., McDonough, B., Sparks, E., Teodorescu, D. L., Cirino, A. L., Banner, N. R., Pennell, D. J., Graw, S., Merlo, M., Di Lenarda, A., Sinagra, G., Bos, J. M., Ackerman, M. J., Mitchell, R. N., Murry, C. E., Lakdawala, N. K., Ho, C. Y., Barton, P. J. R., Cook, S. A., Mestroni, L., Seidman, J. G., and Seidman, C. E. (2012) Truncations of titin causing dilated cardiomyopathy. *N. Engl. J. Med.* **366**, 619–628
10. Gerull, B., Gramlich, M., Atherton, J., McNabb, M., Trombitás, K., Sasse-Klaassen, S., Seidman, J. G., Seidman, C., Granzier, H., Labeit, S., Frenneaux, M., and Thierfelder, L. (2002) Mutations of *TTN*, encoding the giant muscle filament titin, cause familial dilated cardiomyopathy. *Nat. Genet.* **30**, 201–204
11. Ware, J. S., Li, J., Mazaika, E., Yasso, C. M., DeSouza, T., Cappola, T. P., Tsai, E. J., Hilfiker-Kleiner, D., Kamiya, C. A., Mazzarotto, F., Cook, S. A., Halder, I., Prasad, S. K., Pisarcik, J., Hanley-Yanez, K., Alharethi, R., Damp, J., Hsich, E., Elkayam, U., Sheppard, R., Kealey, A., Alexis, J., Ramani, G., Safirstein, J., Boehmer, J., Pauly, D. F., Wittstein, I. S., Thohan, V., Zucker, M. J., Liu, P., Gorcsan, J., McNamara, D. M., Seidman, C. E., Seidman, J. G., Arany, Z., and IMAC-2 and IPAC Investigators (2016) Shared Genetic Predisposition in Peripartum and Dilated Cardiomyopathies. *N. Engl. J. Med.* **374**, 233–241
12. Hackman, P., Vihola, A., Haravuori, H., Marchand, S., Sarparanta, J., De Seze, J., Labeit, S., Witt, C., Peltonen, L., Richard, I., and Udd, B. (2002) Tibial muscular dystrophy is a titinopathy caused by mutations in *TTN*, the gene encoding the giant skeletal-muscle protein titin. *Am. J. Hum. Genet.* **71**, 492–500
13. Li, H., Linke, W. A., Oberhauser, A. F., Carrion-Vazquez, M., Kerkvliet, J. G., Lu, H., Marszalek, P. E., and Fernandez, J. M. (2002) Reverse engineering of the giant muscle protein titin. *Nature.* **418**, 998–1002
14. Rief, M., Gautel, M., Oesterhelt, F., Fernandez, J. M., and Gaub, H. E. (1997) Reversible unfolding of individual titin immunoglobulin domains by AFM. *Science.* **276**, 1109–1112
15. Puchner, E. M., Alexandrovich, A., Kho, A. L., Hensen, U., Schäfer, L. V., Brandmeier, B., Gräter, F., Grubmüller, H., Gaub, H. E., and Gautel, M. (2008) Mechanoenzymatics of titin kinase. *Proc. Natl. Acad. Sci. U. S. A.* **105**, 13385–13390
16. Williams, P. M., Fowler, S. B., Best, R. B., Toca-Herrera, J. L., Scott, K. A., Steward, A., and Clarke, J. (2003) Hidden complexity in the mechanical properties of titin. *Nature.* **422**, 446–449

17. Berkovich, R., Garcia-Manyes, S., Urbakh, M., Klafter, J., and Fernandez, J. M. (2010) Collapse Dynamics of Single Proteins Extended by Force. *Biophys. J.* **98**, 2692–2701
18. Valle-Orero, J., Tapia-Rojo, R., Eckels, E. C., Rivas-Pardo, J. A., Popa, I., and Fernández, J. M. (2017) Proteins Breaking Bad: A Free Energy Perspective. *J. Phys. Chem. Lett.* **8**, 3642–3647
19. Cecconi, C., Shank, E. A., Bustamante, C., and Marqusee, S. (2005) Direct observation of the three-state folding of a single protein molecule. *Science*. **309**, 2057–2060
20. Fernandez, J. M., and Li, H. (2004) Force-clamp spectroscopy monitors the folding trajectory of a single protein. *Science*. **303**, 1674–1678
21. Rivas-Pardo, J. A., Eckels, E. C., Popa, I., Kosuri, P., Linke, W. A., and Fernández, J. M. (2016) Work Done by Titin Protein Folding Assists Muscle Contraction. *Cell Rep.* **14**, 1339–1347
22. Eckels, E. C., Tapia-Rojo, R., Rivas-Pardo, J. A., and Fernández, J. M. (2018) The Work of Titin Protein Folding as a Major Driver in Muscle Contraction. *Annu. Rev. Physiol.* **80**, 327–351
23. Popa, I., Kosuri, P., Alegre-Cebollada, J., Garcia-Manyes, S., and Fernandez, J. M. (2013) Force dependency of biochemical reactions measured by single-molecule force-clamp spectroscopy. *Nat. Protoc.* **8**, 1261–1276
24. Popa, I., Rivas-Pardo, J. A., Eckels, E. C., Echelman, D. J., Badilla, C. L., Valle-Orero, J., and Fernández, J. M. (2016) A HaloTag Anchored Ruler for Week-Long Studies of Protein Dynamics. *J. Am. Chem. Soc.* **138**, 10546–10553
25. Min, D., Jefferson, R. E., Bowie, J. U., and Yoon, T.-Y. (2015) Mapping the energy landscape for second-stage folding of a single membrane protein. *Nat. Chem. Biol.* **11**, 981–987
26. Mártonfalvi, Z., Bianco, P., Linari, M., Caremani, M., Nagy, A., Lombardi, V., and Kellermayer, M. (2014) Low-force transitions in single titin molecules reflect a memory of contractile history. *J. Cell Sci.* **127**, 858–870
27. Valle-Orero, J., Rivas-Pardo, J. A., Tapia-Rojo, R., Popa, I., Echelman, D. J., Haldar, S., and Fernández, J. M. (2017) Mechanical Deformation Accelerates Protein Ageing. *Angew. Chem. Int. Ed Engl.* **56**, 9741–9746
28. Bang, M.-L., Centner, T., Fornoff, F., Geach, A. J., Gotthardt, M., McNabb, M., Witt, C. C., Labeit, D., Gregorio, C. C., Granzier, H., and Labeit, S. (2001) The Complete Gene Sequence of Titin, Expression of an Unusual  $\approx 700$ -kDa Titin Isoform, and Its Interaction With Obscurin Identify a Novel Z-Line to I-Band Linking System. *Circ. Res.* **89**, 1065–1072
29. Peters, B., Stein, J., Klingl, S., Sander, N., Sandmann, A., Taccardi, N., Sticht, H., Gerlach, R. G., Muller, Y. A., and Hensel, M. (2017) Structural and functional dissection reveals distinct roles of  $\text{Ca}^{2+}$ -binding sites in the giant adhesin SiiE of *Salmonella enterica*. *PLOS Pathog.* **13**, e1006418
30. Jensen, S. A., Robertson, I. B., and Handford, P. A. (2012) Dissecting the fibrillin microfibril: structural insights into organization and function. *Struct. Lond. Engl.* **1993**, 20, 215–225
31. Rees, D. J., Ades, S. E., Singer, S. J., and Hynes, R. O. (1990) Sequence and domain structure of talin. *Nature*. **347**, 685–689
32. Carrion-Vazquez, M., Oberhauser, A. F., Fowler, S. B., Marszalek, P. E., Broedel, S. E., Clarke, J., and Fernandez, J. M. (1999) Mechanical and chemical unfolding of a single protein: A comparison. *Proc. Natl. Acad. Sci.* **96**, 3694–3699
33. Haining, A. W. M., von Essen, M., Attwood, S. J., Hytönen, V. P., and del Río Hernández, A. (2016) All Subdomains of the Talin Rod Are Mechanically Vulnerable and May Contribute To Cellular Mechanosensing. *ACS Nano*. **10**, 6648–6658
34. Rognoni, L., Stigler, J., Pelz, B., Ylänne, J., and Rief, M. (2012) Dynamic force sensing of filamin revealed in single-molecule experiments. *Proc. Natl. Acad. Sci.* **109**, 19679–19684
35. Griessl, M. H., Schmid, B., Kassler, K., Braunsmann, C., Ritter, R., Barlag, B., Stierhof, Y.-D., Sturm, K. U., Danzer, C., Wagner, C., Schäffer, T. E., Sticht, H., Hensel, M., and Muller, Y. A. (2013) Structural insight into the giant  $\text{Ca}^{2+}$ -binding adhesin SiiE:

- 1 implications for the adhesion of Salmonella enterica to polarized epithelial cells. *Struct.*
- 2 *Lond. Engl.* 1993. **21**, 741–752
- 3 36. Herrero-Galán, E., Martínez-Martín, I., and Alegre-Cebollada, J. (2018) Redox regulation
- 4 of protein nanomechanics in health and disease: Lessons from titin. *Redox Biol.* **21**,
- 5 101074
- 6 37. Kellermayer, M. S., Smith, S. B., Granzier, H. L., and Bustamante, C. (1997) Folding-
- 7 unfolding transitions in single titin molecules characterized with laser tweezers. *Science.*
- 8 **276**, 1112–1116
- 9 38. Tskhovrebova, L., Trinick, J., Sleep, J. A., and Simmons, R. M. (1997) Elasticity and
- 10 unfolding of single molecules of the giant muscle protein titin. *Nature.* **387**, 308–312
- 11 39. Prado, L. G., Makarenko, I., Andresen, C., Krüger, M., Opitz, C. A., and Linke, W. A.
- 12 (2005) Isoform Diversity of Giant Proteins in Relation to Passive and Active Contractile
- 13 Properties of Rabbit Skeletal Muscles. *J. Gen. Physiol.* **126**, 461–480
- 14 40. Brynneel, A., Hernandez, Y., Kiss, B., Lindqvist, J., Adler, M., Kolb, J., van der Pijl, R.,
- 15 Gohlke, J., Strom, J., Smith, J., Ottenheijm, C., and Granzier, H. L. (2018) Downsizing the
- 16 molecular spring of the giant protein titin reveals that skeletal muscle titin determines
- 17 passive stiffness and drives longitudinal hypertrophy. *eLife.* **7**, e40532
- 18 41. Ottenheijm, C. A. C., Kottnerus, A. M., Buck, D., Luo, X., Greer, K., Hoving, A., Labeit,
- 19 S., and Granzier, H. (2009) Tuning Passive Mechanics through Differential Splicing of
- 20 Titin during Skeletal Muscle Development. *Biophys. J.* **97**, 2277–2286
- 21 42. Los, G. V., Encell, L. P., McDougall, M. G., Hartzell, D. D., Karassina, N., Zimprich, C.,
- 22 Wood, M. G., Learish, R., Ohana, R. F., Urh, M., Simpson, D., Mendez, J., Zimmerman,
- 23 K., Otto, P., Vidugiris, G., Zhu, J., Darzins, A., Klaubert, D. H., Bulleit, R. F., and Wood,
- 24 K. V. (2008) HaloTag: A Novel Protein Labeling Technology for Cell Imaging and
- 25 Protein Analysis. *ACS Chem. Biol.* **3**, 373–382
- 26 43. Greaser, M. L., and Pleitner, J. M. (2014) Titin isoform size is not correlated with thin
- 27 filament length in rat skeletal muscle. *Front. Physiol.* 10.3389/fphys.2014.00035
- 28 44. Granzier, H. L., Hutchinson, K. R., Tonino, P., Methawasin, M., Li, F. W., Slater, R. E.,
- 29 Bull, M. M., Saripalli, C., Pappas, C. T., Gregorio, C. C., and Smith, J. E. (2014) Deleting
- 30 titin's I-band/A-band junction reveals critical roles for titin in biomechanical sensing and
- 31 cardiac function. *Proc. Natl. Acad. Sci. U. S. A.* **111**, 14589–14594
- 32 45. Horowitz, R., Kempner, E. S., Bisher, M. E., and Podolsky, R. J. (1986) A physiological
- 33 role for titin and nebulin in skeletal muscle. *Nature.* **323**, 160–164
- 34 46. Zou, J., Tran, D., Baalbaki, M., Tang, L. F., Poon, A., Pelonero, A., Titus, E. W., Yuan, C.,
- 35 Shi, C., Patchava, S., Halper, E., Garg, J., Movsesyan, I., Yin, C., Wu, R., Wilsbacher, L.
- 36 D., Liu, J., Hager, R. L., Coughlin, S. R., Jinek, M., Pullinger, C. R., Kane, J. P., Hart, D.
- 37 O., Kwok, P.-Y., and Deo, R. C. (2015) An internal promoter underlies the difference in
- 38 disease severity between N- and C-terminal truncation mutations of Titin in zebrafish.
- 39 *eLife.* **4**, e09406
- 40 47. Linke, W. A., Ivemeyer, M., Olivieri, N., Kolmerer, B., Rüegg, J. C., and Labeit, S. (1996)
- 41 Towards a molecular understanding of the elasticity of titin. *J. Mol. Biol.* **261**, 62–71
- 42 48. Gautel, M., Lakey, A., Barlow, D. P., Holmes, Z., Scales, S., Leonard, K., Labeit, S.,
- 43 Mygland, A., Gilhus, N. E., and Aarli, J. A. (1993) Titin antibodies in myasthenia gravis:
- 44 identification of a major immunogenic region of titin. *Neurology.* **43**, 1581–1585
- 45 49. Taniguchi, Y., and Kawakami, M. (2010) Application of HaloTag Protein to Covalent
- 46 Immobilization of Recombinant Proteins for Single Molecule Force Spectroscopy.
- 47 *Langmuir.* **26**, 10433–10436
- 48 50. Popa, I., Berkovich, R., Alegre-Cebollada, J., Badilla, C. L., Rivas-Pardo, J. A., Taniguchi,
- 49 Y., Kawakami, M., and Fernandez, J. M. (2013) Nanomechanics of HaloTag Tethers. *J.*
- 50 *Am. Chem. Soc.* **135**, 12762–12771
- 51 51. Fürst, D. O., Osborn, M., Nave, R., and Weber, K. (1988) The organization of titin
- 52 filaments in the half-sarcomere revealed by monoclonal antibodies in immunoelectron
- 53 microscopy: a map of ten nonrepetitive epitopes starting at the Z line extends close to the
- 54 M line. *J. Cell Biol.* **106**, 1563–1572

52. Sebestyén, M. G., Wolff, J. A., and Greaser, M. L. (1995) Characterization of a 5.4 kb cDNA fragment from the Z-line region of rabbit cardiac titin reveals phosphorylation sites for proline-directed kinases. *J. Cell Sci.* **108** ( Pt 9), 3029–3037
53. Oberhauser, A. F., Hansma, P. K., Carrion-Vazquez, M., and Fernandez, J. M. (2001) Stepwise unfolding of titin under force-clamp atomic force microscopy. *Proc. Natl. Acad. Sci. U. S. A.* **98**, 468–472
54. Giganti, D., Yan, K., Badilla, C. L., Fernandez, J. M., and Alegre-Cebollada, J. (2018) Disulfide isomerization reactions in titin immunoglobulin domains enable a mode of protein elasticity. *Nat. Commun.* **9**, 185
55. Ainaravapu, S. R. K., Brujic, J., Huang, H. H., Wiita, A. P., Lu, H., Li, L., Walther, K. A., Carrion-Vazquez, M., Li, H., and Fernandez, J. M. (2007) Contour length and refolding rate of a small protein controlled by engineered disulfide bonds. *Biophys. J.* **92**, 225–233
56. Marszalek, P. E., Lu, H., Li, H., Carrion-Vazquez, M., Oberhauser, A. F., Schulten, K., and Fernandez, J. M. (1999) Mechanical unfolding intermediates in titin modules. *Nature*. **402**, 100–103
57. Nunes, J. M., Hensen, U., Ge, L., Lipinsky, M., Helenius, J., Grubmüller, H., and Muller, D. J. (2010) A “force buffer” protecting immunoglobulin titin. *Angew. Chem. Int. Ed Engl.* **49**, 3528–3531
58. Schlierf, M., Li, H., and Fernandez, J. M. (2004) The unfolding kinetics of ubiquitin captured with single-molecule force-clamp techniques. *Proc. Natl. Acad. Sci. U. S. A.* **101**, 7299–7304
59. Oberhauser, A. F., Marszalek, P. E., Carrion-Vazquez, M., and Fernandez, J. M. (1999) Single protein misfolding events captured by atomic force microscopy. *Nat. Struct. Mol. Biol.* **6**, 1025–1028
60. Borgia, M. B., Borgia, A., Best, R. B., Steward, A., Nettels, D., Wunderlich, B., Schuler, B., and Clarke, J. (2011) Single-molecule fluorescence reveals sequence-specific misfolding in multidomain proteins. *Nature*. **474**, 662–665
61. Bianco, P., Mártonfalvi, Z., Naftz, K., Kőszegi, D., and Kellermayer, M. (2015) Titin domains progressively unfolded by force are homogenously distributed along the molecule. *Biophys. J.* **109**, 340–345
62. Bustamante, C., Marko, J. F., Siggia, E. D., and Smith, S. (1994) Entropic elasticity of lambda-phage DNA. *Science*. **265**, 1599–1600
63. Smith, S. B., Finzi, L., and Bustamante, C. (1992) Direct mechanical measurements of the elasticity of single DNA molecules by using magnetic beads. *Science*. **258**, 1122–1126
64. Mártonfalvi, Z., Bianco, P., Naftz, K., Ferenczy, G. G., and Kellermayer, M. (2017) Force generation by titin folding. *Protein Sci. Publ. Protein Soc.* **26**, 1380–1390
65. Yuan, G., Le, S., Yao, M., Qian, H., Zhou, X., Yan, J., and Chen, H. (2017) Elasticity of the Transition State Leading to an Unexpected Mechanical Stabilization of Titin Immunoglobulin Domains. *Angew. Chem. Int. Ed Engl.* **56**, 5490–5493
66. Haldar, S., Tapia-Rojo, R., Eckels, E. C., Valle-Orero, J., and Fernandez, J. M. (2017) Trigger factor chaperone acts as a mechanical foldase. *Nat. Commun.* **8**, 668
67. Bullard, B., Ferguson, C., Minajeva, A., Leake, M. C., Gautel, M., Labeit, D., Ding, L., Labeit, S., Horwitz, J., Leonard, K. R., and Linke, W. A. (2004) Association of the Chaperone  $\alpha$ B-crystallin with Titin in Heart Muscle. *J. Biol. Chem.* **279**, 7917–7924
68. Perales-Calvo, J., Giganti, D., Stirnemann, G., and Garcia-Manyes, S. (2018) The force-dependent mechanism of DnaK-mediated mechanical folding. *Sci. Adv.* **4**, eaaq0243
69. Soranno, A., Koenig, I., Borgia, M. B., Hofmann, H., Zosel, F., Nettels, D., and Schuler, B. (2014) Single-molecule spectroscopy reveals polymer effects of disordered proteins in crowded environments. *Proc. Natl. Acad. Sci.* **111**, 4874–4879
70. Alegre-Cebollada, J., Kosuri, P., Giganti, D., Eckels, E., Rivas-Pardo, J. A., Hamdani, N., Warren, C. M., Solaro, R. J., Linke, W. A., and Fernández, J. M. (2014) S-Glutathionylation of Cryptic Cysteines Enhances Titin Elasticity by Blocking Protein Folding. *Cell*. **156**, 1235–1246

71. Krüger, M., Kötter, S., Grützner, A., Lang, P., Andresen, C., Redfield, M. M., Butt, E., dos Remedios, C. G., and Linke, W. A. (2009) Protein kinase G modulates human myocardial passive stiffness by phosphorylation of the titin springs. *Circ. Res.* **104**, 87–94
72. Robison, P., Caporizzo, M. A., Ahmadzadeh, H., Bogush, A. I., Chen, C. Y., Margulies, K. B., Shenoy, V. B., and Prosser, B. L. (2016) Detyrosinated microtubules buckle and bear load in contracting cardiomyocytes. *Science*. **352**, aaf0659
73. England, C. G., Luo, H., and Cai, W. (2015) HaloTag technology: a versatile platform for biomedical applications. *Bioconjug. Chem.* **26**, 975–986
74. Knott, G. J., and Doudna, J. A. (2018) CRISPR-Cas guides the future of genetic engineering. *Science*. **361**, 866–869
75. HaloTag Interchangeable Labeling Technology for Cell Imaging Protein Capture and Immobilization [online] <https://worldwide.promega.com/resources/pubhub/promega-notes-2005/halotag-interchangeable-labeling-technology-for-cell-imaging-protein-capture-and-immobilization/?activeTab=0> (Accessed November 4, 2018)
76. da Silva Lopes, K., Pietas, A., Radke, M. H., and Gotthardt, M. (2011) Titin visualization in real time reveals an unexpected level of mobility within and between sarcomeres. *J. Cell Biol.* **193**, 785–798
77. Linke, W. A., Ivemeyer, M., Labeit, S., Hinssen, H., Rüegg, J. C., and Gautel, M. (1997) Actin-titin interaction in cardiac myofibrils: probing a physiological role. *Biophys. J.* **73**, 905–919
78. Soteriou, A., Gamage, M., and Trinick, J. (1993) A survey of interactions made by the giant protein titin. *J. Cell Sci.* **104**, 119–123
79. Blommel, P. G., and Fox, B. G. (2007) A combined approach to improving large-scale production of tobacco etch virus protease. *Protein Expr. Purif.* **55**, 53–68
80. Unger, A., Beckendorf, L., Böhme, P., Kley, R., von Frieling-Salewsky, M., Lochmüller, H., Schröder, R., Fürst, D. O., Vorgerd, M., and Linke, W. A. (2017) Translocation of molecular chaperones to the titin springs is common in skeletal myopathy patients and affects sarcomere function. *Acta Neuropathol. Commun.* **5**, 72

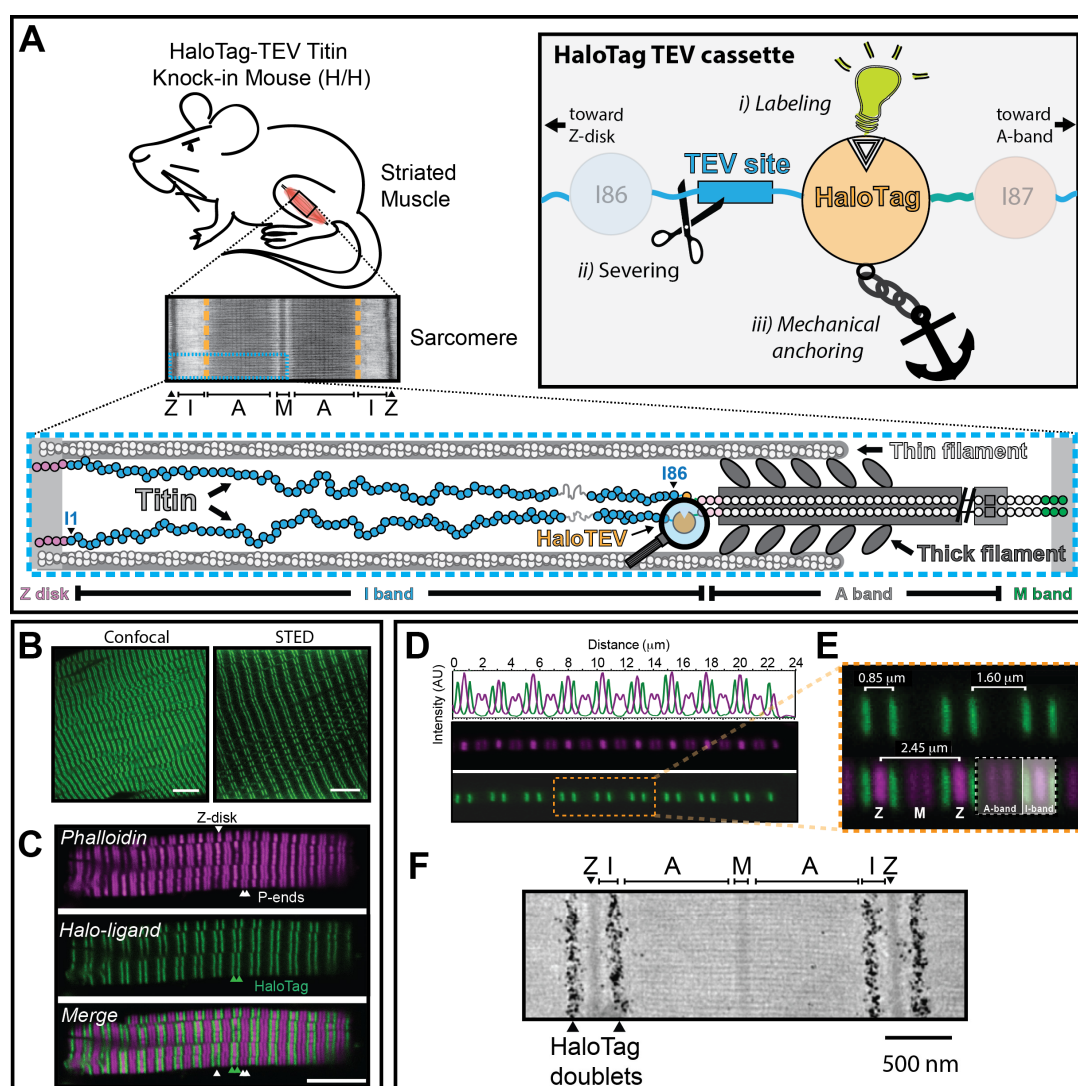

**Figure 1. The HaloTag-TEV cassette.** (A) We inserted the HaloTag-TEV cassette in the *TTN* gene to generate a mouse model for the study of the mechanical properties of native titin. *Bottom*: Schematic representation of one half-sarcomere showing the three main filaments of sarcomeres: the thin filament, the thick filament and titin. A single titin molecule spans from the Z-disk to the M-band. The HaloTag-TEV knock-in cassette is located at the end of the I-band, between the I86 and I87 domains. *Inset*: The HaloTag-TEV cassette allows (i) specific labeling, (ii) titin severing to examine tissue mechanics, and (iii) covalent anchoring for single-molecule force spectroscopy. (B) Gastrocnemius muscle extracted from homozygous knock-in HaloTag-TEV titin mice is labeled with the membrane permeable Oregon Green HaloTag ligand, fixated and electrophoretic cleared following the X-Clarity method. The specimen is then imaged using confocal and STED microscopies. The scale bars correspond 10 and 5 μm, respectively. (C) Freshly extracted skeletal myofibrils are stained with Alexa488 HaloTag ligand and Alexa Fluor 647 phalloidin, and subsequently imaged using confocal microscopy. Phalloidin specifically binds naked actin, resulting in strong fluorescent signal at the Z-disk region and the pointed ends of the thin filament (P-ends), as indicated by white arrowheads. According to the pattern of phalloidin labeling, the HaloTag appears correctly positioned flanking the A-band of every sarcomere (green arrowheads). Thus, the HaloTag doublet pattern corresponds to the HaloTag-TEV cassette flanking two I-bands from two juxtaposed sarcomeres. Scale bar, 7.5 μm. (D) A single myofibril labeled with Alexa488 HaloTag ligand and Alexa Fluor 647 phalloidin is used to measure the distance between fluorescent bands. (E) The HaloTag doublets are separated approximately 1.5-1.6 μm, while the distance between the bands in the doublets is variable (0.85 μm in this particular example) as a consequence of different contraction statuses of sarcomeres. (F) EM image showing the location of gold-particle-labeled HaloTag in a soleus muscle.

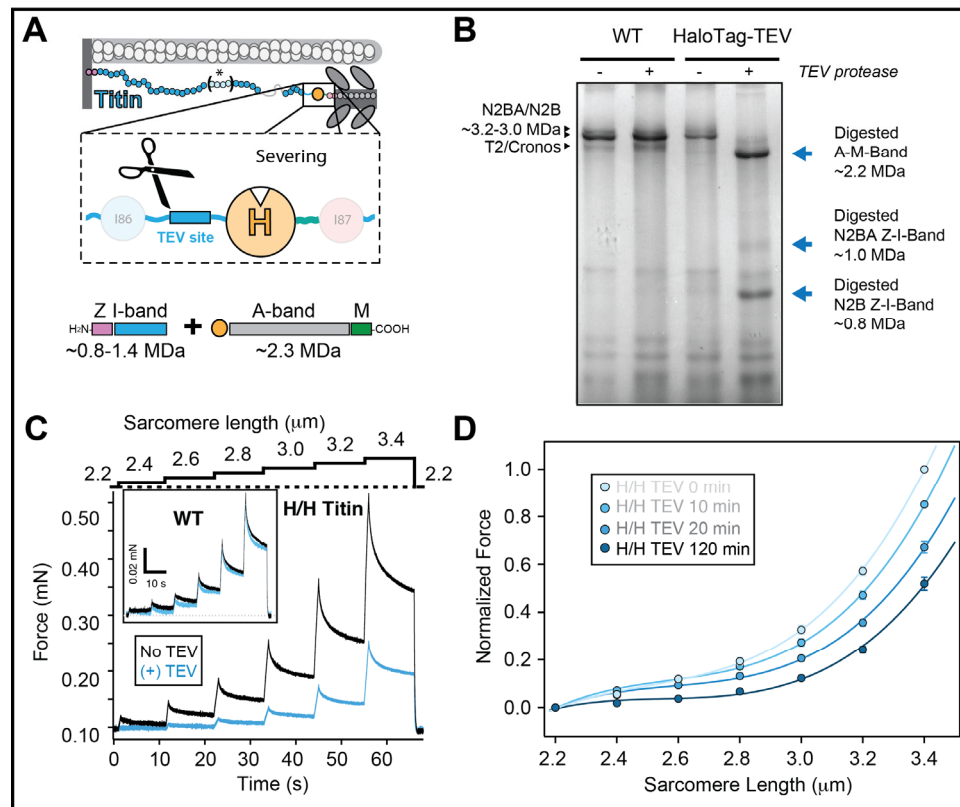

**Figure 2. Directed severing of native HaloTag-TEV titin.** (A) Following treatment with TEV protease, the HaloTag-TEV titin is expected to result in two fragments: A-M-band fragment (~2.2 MDa) and the Z-disk/I-band fragment, which can show a range of molecular weights depending on the specific titin isoform (represented by asterisk and brackets in the titin diagram). (B) Digestion of cardiac titin is tracked by 1.8% polyacrylamide SDS-PAGE electrophoresis and Coomassie staining. Wild-type titin is not affected by incubation with TEV protease, so typical bands corresponding to full size N2BA/N2B isoforms and to the T2 fragment or the Cronos isoform are observed in both lanes. In contrast, digestion of HaloTag-TEV titin results in a main band at 2.2 MDa, corresponding to the A-M-band fragment, and two extra bands at 0.8 and 1.0 MDa that are assigned to the I-band portions of the N2B and N2BA cardiac isoforms, respectively. (C) Passive stiffness of skinned bundles of psoas myofibres isolated from homozygous HaloTag-TEV titin mice (H/H). Myofibers were stretched in steps to increasing sarcomere lengths, and the resulting passive force was recorded. Force was first measured in relaxing buffer, then myofibers were incubated with TEV for 30 min at slack length (2.2 μm), and the measurement was repeated. Passive force drops by more than 50% following incubation with TEV. *Inset*: control experiment with wild-type fibers. (D) The drop in passive force that results from incubation of HaloTag-TEV titin fibers with TEV protease is time-dependent. To average several experiments (n = 6), force values are normalized to the value at 3.4 μm SL before the treatment with TEV. Error bars represent SEM.

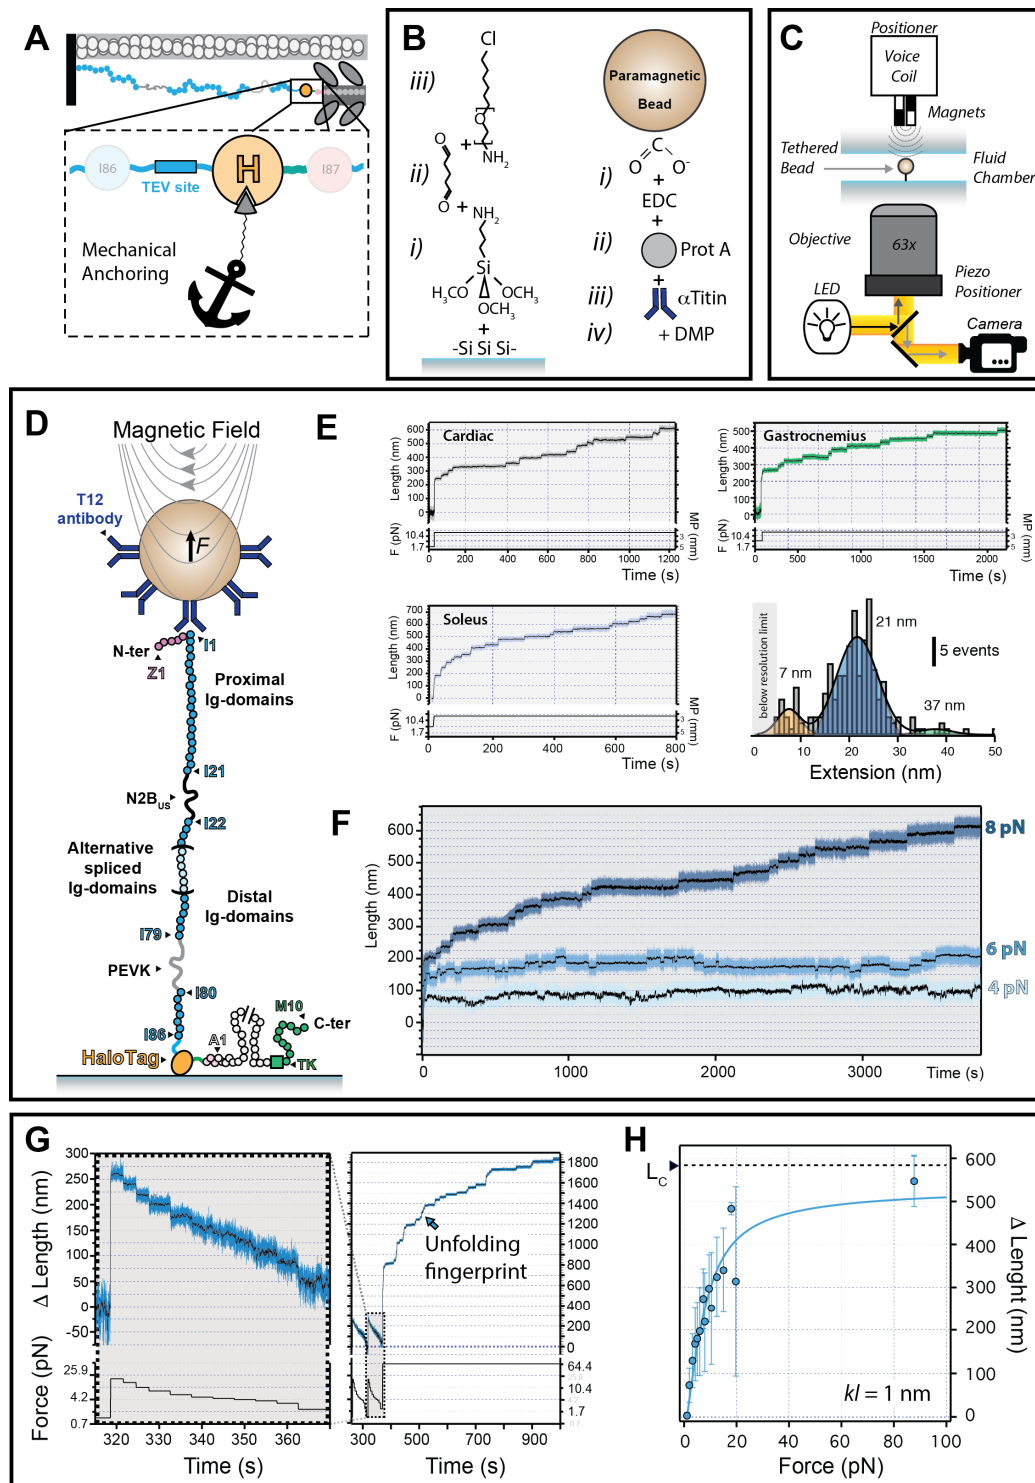

**Figure 3. Magnetic-Tweezers-based single-molecule force-spectroscopy of native HaloTag-TEV titin.** (A) Scheme of HaloTag-mediated titin immobilization. (B) Glass and bead functionalization by surface chemistry (see Methods for details). (C) Cartoon showing the MT setup (21, 24). (D) Using T12-antibody-functionalized paramagnetic beads and HaloTag-derivatized glass surfaces, only the elastic segment titin I-band is stretched during MT pulling experiments. Relevant regions of titin are indicated. (E) Titin molecules purified from three different muscles are stretched at 19.7 pN, resulting in unfolding steps. The histogram shows three different populations of step sizes. (F) Naïve titin molecules are pulled at 4-8 pN, which results in recruitment of domains to the unfolded state. (G) *Left*: The length of naïve titin tethers before domain unfolding is measured at different forces and referenced to the length measured at 1.1 pN to obtain  $\Delta$  Length. *Right*: tethers are then subject to high force to verify single-molecule tethering from the fingerprint of domain unfolding steps. (H)  $\Delta$  Length estimated at different forces for gastrocnemius HaloTag-TEV titin tethers (515 measurements from 7 different molecules). Error bars represent SD.

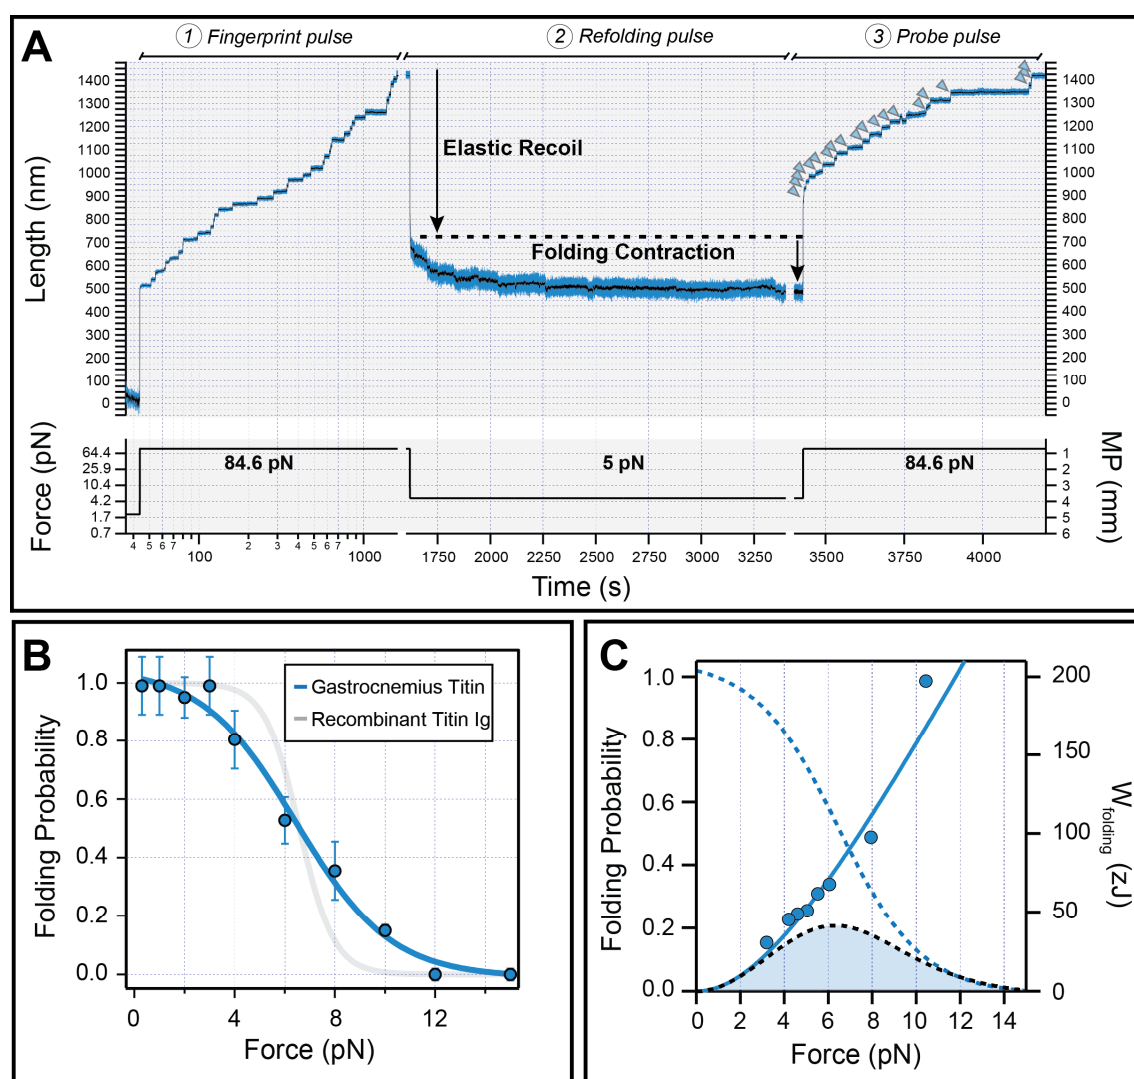

**Figure 4. Mechanical work generated by native titin folding.** (A) We follow a three-pulse force protocol. During the fingerprint pulse at high forces (1), Ig domains are recruited to the unfolded state. These domains are allowed to refold during the long refolding pulse at low force (2). To estimate folding fractions, we measure the number of domains that unfold in the final probe pulse (3), and compare with the initial number of unfolding domains in the fingerprint pulse. Arrowheads point to unfolding events in the probe pulse. (B) Folding probability of the I-band of native HaloTag-TEV titin isolated from gastrocnemius muscle (blue symbols). Solid line shows a sigmoidal fit to the data. The folding probability is less cooperative than the one obtained with engineered titin Ig domains (in gray, data from Rivas-Pardo *et al.* (21)), while the  $P_{F0.5}$  remains very similar. (C) Force-dependency of the work delivered by titin domain folding, which is obtained by multiplying step sizes by force (blue symbols). The solid line considers the steps size obtained by the worm like chain model. Considering the probability of folding (blue dashed line, data from panel B), we calculate the expected work delivered by titin folding (black dashed line, filled area), which peaks at 6.3 pN producing 41.5 zJ.
