# Supplementary material for: A HaloTag-TEV genetic cassette for mechanical phenotyping of proteins from tissues
Source: bioRxiv or medRxiv preprint supplement (doi:10.1101/577445), 2020-01-17
Supplement: Supplementary file [file media-1.pdf]

1  
2  
3  
4  
5  
6  
7  
8  
9  
10  
11  
12  
13  
14  
15  
16  
17  
18  
19  
20  
21  
22  
23  
24  
25  
26  
27  
28  
29  
30  
31  
32  
33  
34  
35  
36  
37  
38  
39  
40  
41  
42  
43  
44  
45  
46

## Supplementary Information

# A HaloTag-TEV genetic cassette for mechanical phenotyping of native proteins

Jaime Andrés Rivas-Pardo<sup>1,5</sup>, Yong Li<sup>2</sup>, Zsolt Mártonfalvi<sup>3</sup>, Rafael Tapia-Rojo<sup>1</sup>, Andreas Unger<sup>2</sup>, Ángel Fernández-Trasancos<sup>4</sup>, Elías Herrero-Galán<sup>4</sup>, Diana Velázquez-Carreras<sup>4</sup>, Wolfgang A. Linke<sup>2,\*</sup>, Julio M. Fernández<sup>1,\*</sup>, Jorge Alegre-Cebollada<sup>4,\*</sup>

<sup>1</sup> Department of Biological Sciences, Columbia University, New York, USA

<sup>2</sup> Institute of Physiology II, University of Muenster, Muenster, Germany

<sup>3</sup> Department of Biophysics and Radiation Biology, Semmelweis University, Budapest, Hungary

<sup>4</sup> Centro Nacional de Investigaciones Cardiovasculares (CNIC), Madrid, Spain

<sup>5</sup> Current address: Departamento de Física, Facultad de Ciencias, Departamento de Biología, Facultad de Química y Biología, Universidad de Santiago de Chile, Santiago, Chile

\* To whom correspondence should be addressed: [wlinke@uni-muenster.de](mailto:wlinke@uni-muenster.de); [jfernandez@columbia.edu](mailto:jfernandez@columbia.edu); [jalegre@cnic.es](mailto:jalegre@cnic.es) (@AlegreCebollada)

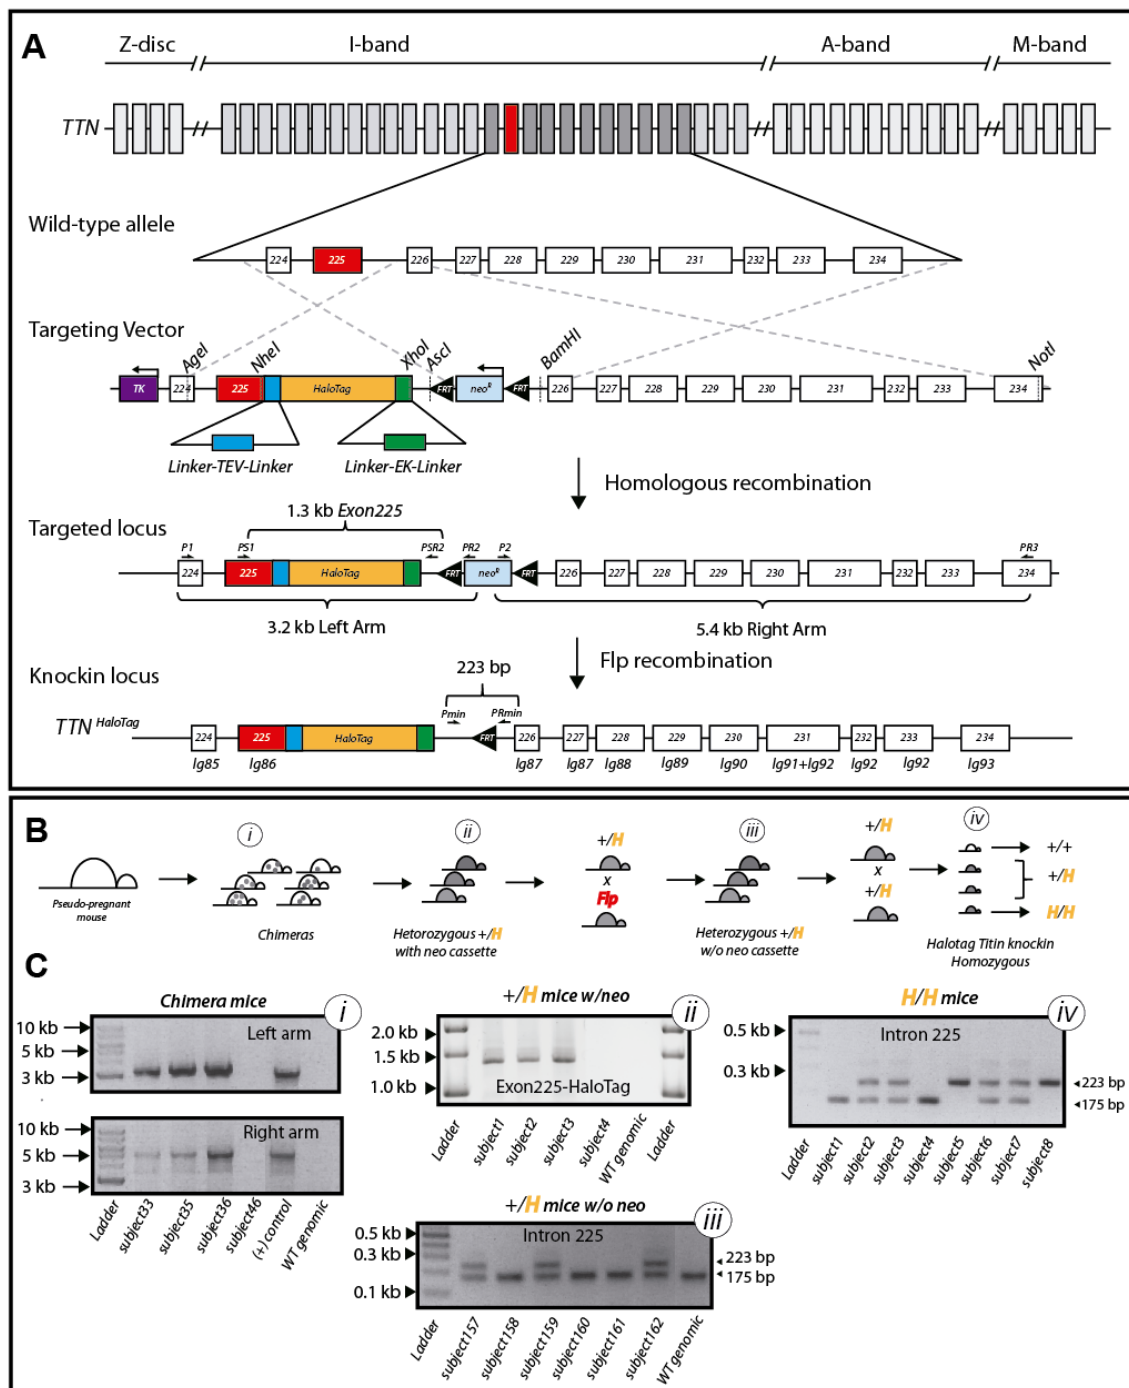

1  
 2  
 3 **Supplementary Figure S1. Generation of knock-in mice with the HaloTag-TEV cassette**  
 4 **inserted into the titin gene.** (A) The targeting vector contains the *TTN* sequence between exons  
 5 224 and 234. The HaloTag gene is inserted downstream of exon 225, flanked by linkers  
 6 including TEV and EK sites. A Neo resistance gene flanked by FRT elements was inserted in  
 7 intron 225. Restriction sites and primers used during the different genetic engineering steps are  
 8 shown, together with the size in base pairs (bp) of relevant fragments. (B) Strategy followed to  
 9 get homozygous knock-in mice (H/H) from recombinant ES cells. The different experimental  
 10 stages are labeled i-iv, see below. (C) We used PCR amplification of genomic DNA to confirm  
 11 (i) the presence of the HaloTag in the *TTN* gene in chimera mice (primers *P1* and *PR2*, *left arm*;  
 12 primers *P2* and *PR3*, *right arm*), (ii and iii) the presence and subsequent removal of the neo  
 13 resistance by crossing with Flp mice (primers *PS1* and *PSR2*, Exon225-HaloTag; *Pmin* and  
 14 *PRmin*, Intron225), and (iv) the generation of the homozygous H/H titin mouse (*Pmin* and  
 15 *PRmin*). We used the vector construct and wild-type genomic DNA as controls.

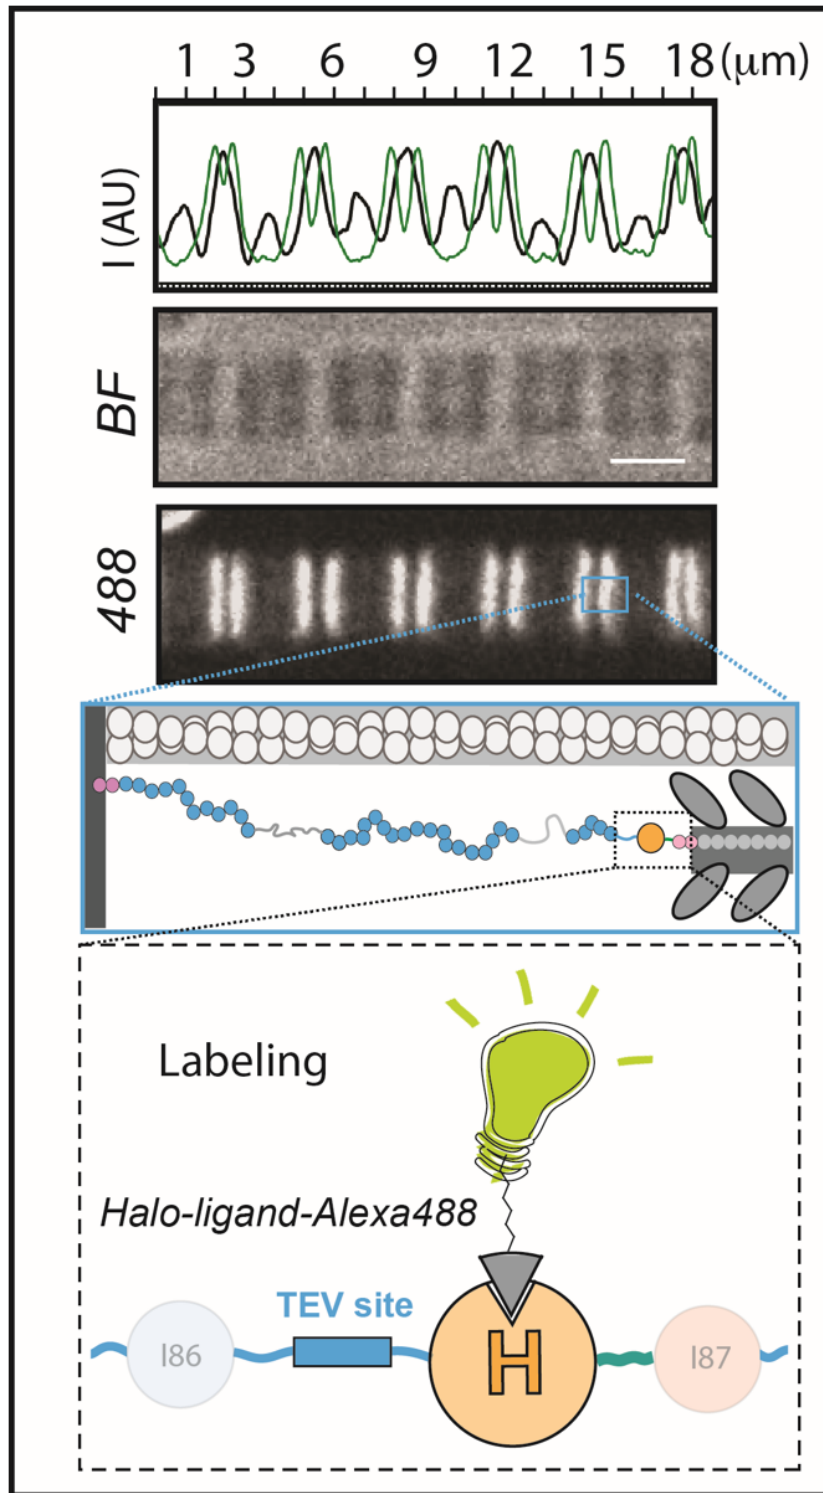

**Supplementary Figure S2. Spinning disk microscopy.** Under bright field illumination, the A- and I-band sections are easily distinguished along the myofibril as dark and clear regions, respectively (middle panel, BF). The fluorescent signal coming from Alexa488-labeled HaloTag-TEV titin appears as doublets at the I/A band interface (bottom panel, 488). The top panel shows intensity profiles (Alexa488 fluorescence in green and brightfield intensity in black). *Insets:* Cartoons showing the location of the HaloTag-labeled titin. Scale bar, 2.5  $\mu\text{m}$ .

Confocal

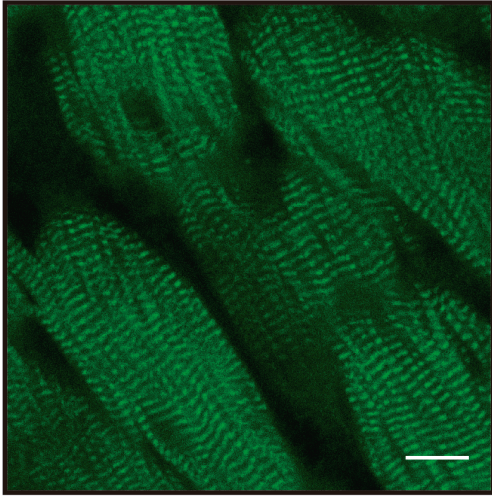

STED

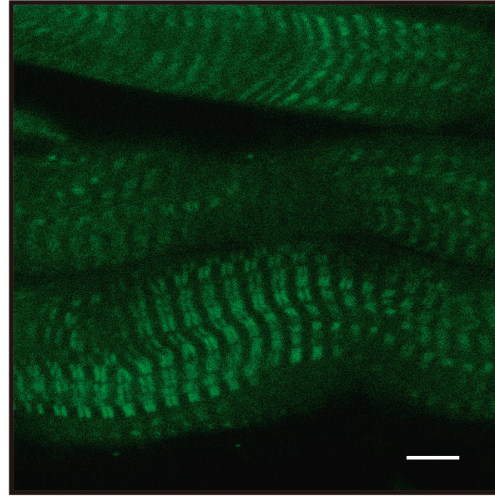

**Supplementary Figure S3. The HaloTag-TEV cassette is correctly inserted in cardiac titin.** The heart of a homozygous HaloTag-TEV titin mouse was incubated with HaloTag Oregon Green ligand, fixed and clarified. Although these samples show higher autofluorescence than skeletal preparations (**Figure 1B**), there is strong labeling in bands as expected from the location of the HaloTag insertion in titin (**Figure 1A**). Staining in doublets can also be observed, although to a lesser extent than in skeletal muscle, probably reflecting shorter I-bands in cardiac sarcomeres. Scale bars: 10  $\mu\text{m}$  (Confocal) and 5  $\mu\text{m}$  (STED).

1

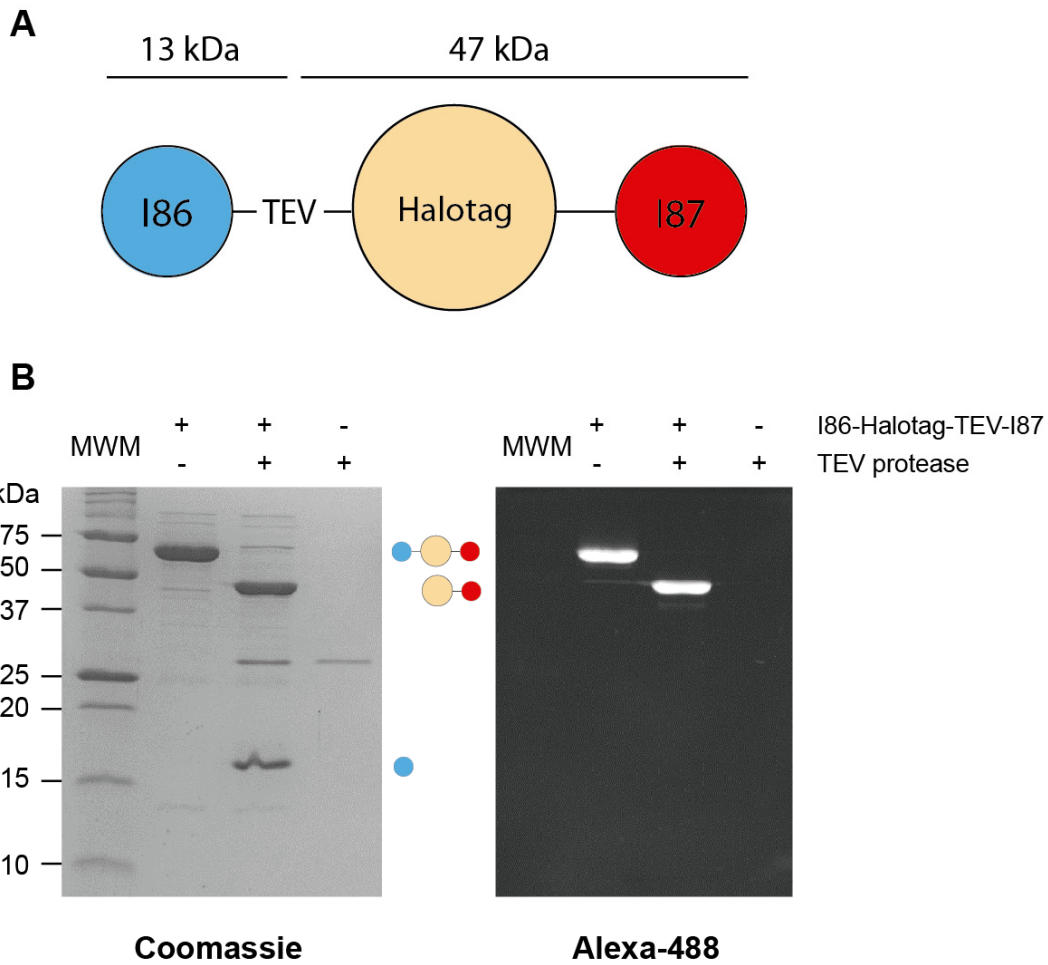

**Supplementary Figure S4. Digestion of recombinant HaloTag-TEV titin fragment.** (A) Scheme of I86-HaloTag-TEV-I87 (60 kDa) showing the size of the fragments that result from TEV digestion. (B) I86-HaloTag-TEV-I87 was treated or not with TEV protease (28 kDa) at 34°C for 1 hour, and results were analyzed by 17% SDS-PAGE. Digestion resulted in the appearance of two new bands at the expected mobility (*left*, Coomassie staining). Specificity of TEV-cleavage is demonstrated by labeling with HaloTag Alexa488 ligand, which only reacts with HaloTag-containing bands (*right*, Alexa488 fluorescence).

1  
2  
3

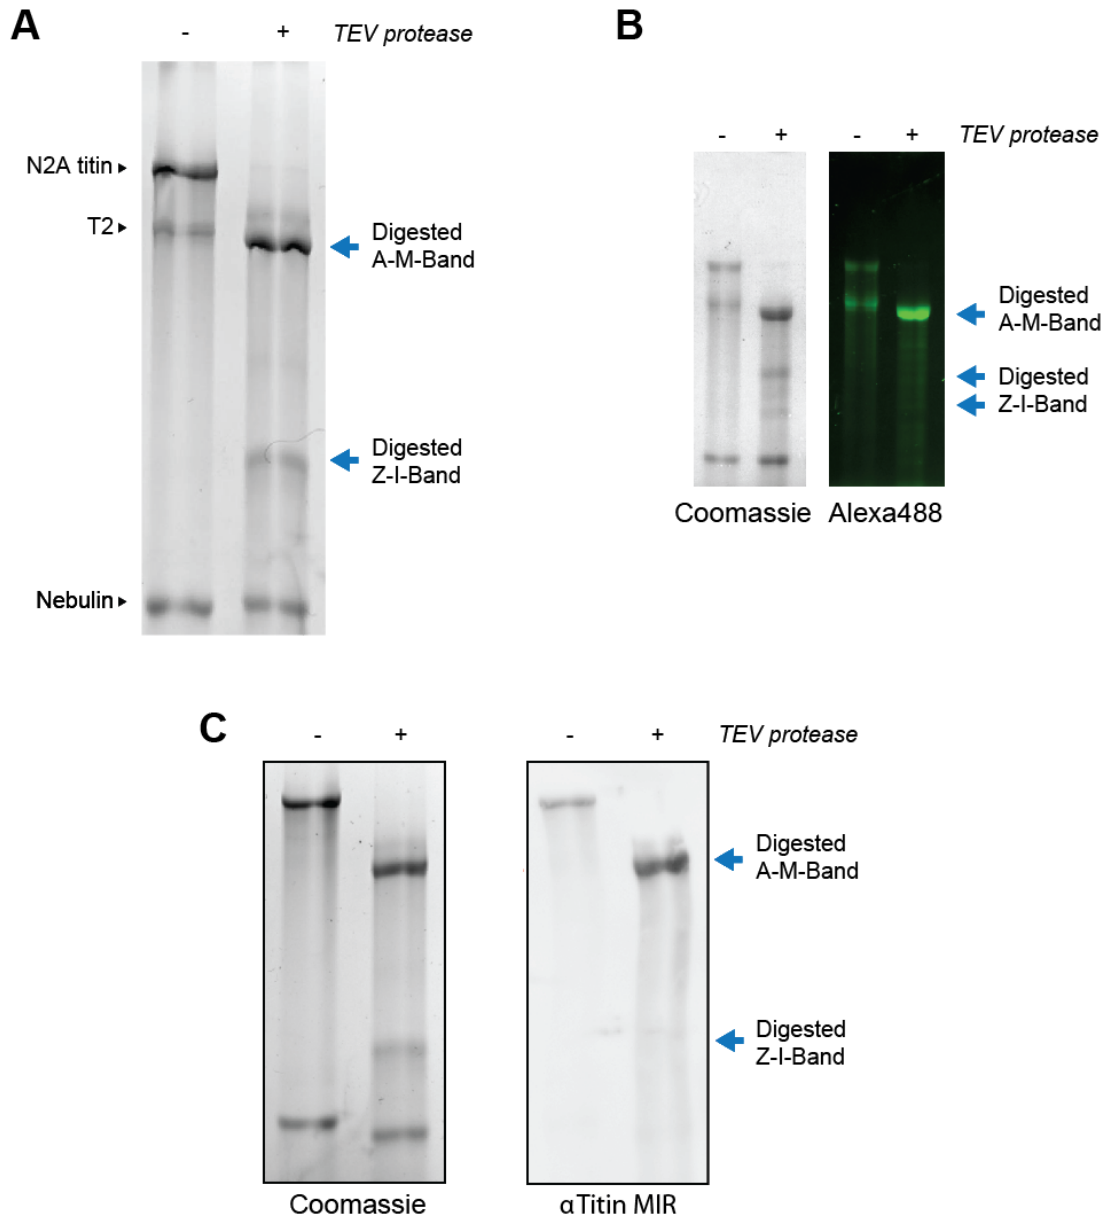

1  
2 **Supplementary Figure S5. TEV digestion of skeletal muscles from homozygous HaloTag-**  
3 **TEV titin mice, as analyzed using 1.8% acrylamide SDS-PAGE gels. (A)** Results of TEV-  
4 digestion of isolated soleus myofibrils (Coomassie staining). **(B)** Analysis of the digestion of  
5 psoas myofibrils with TEV. Both Coomassie staining and HaloTag Alexa488 ligand are used to  
6 visualize proteins. The HaloTag-specific Alexa488 ligand only labels the digested A-M-band  
7 fragment **(C)** Equivalent results are obtained in TEV digestions of soleus myofibrils, as analyzed  
8 by western blot using the MIR antibody, which recognizes the A-band segment of titin.  
9

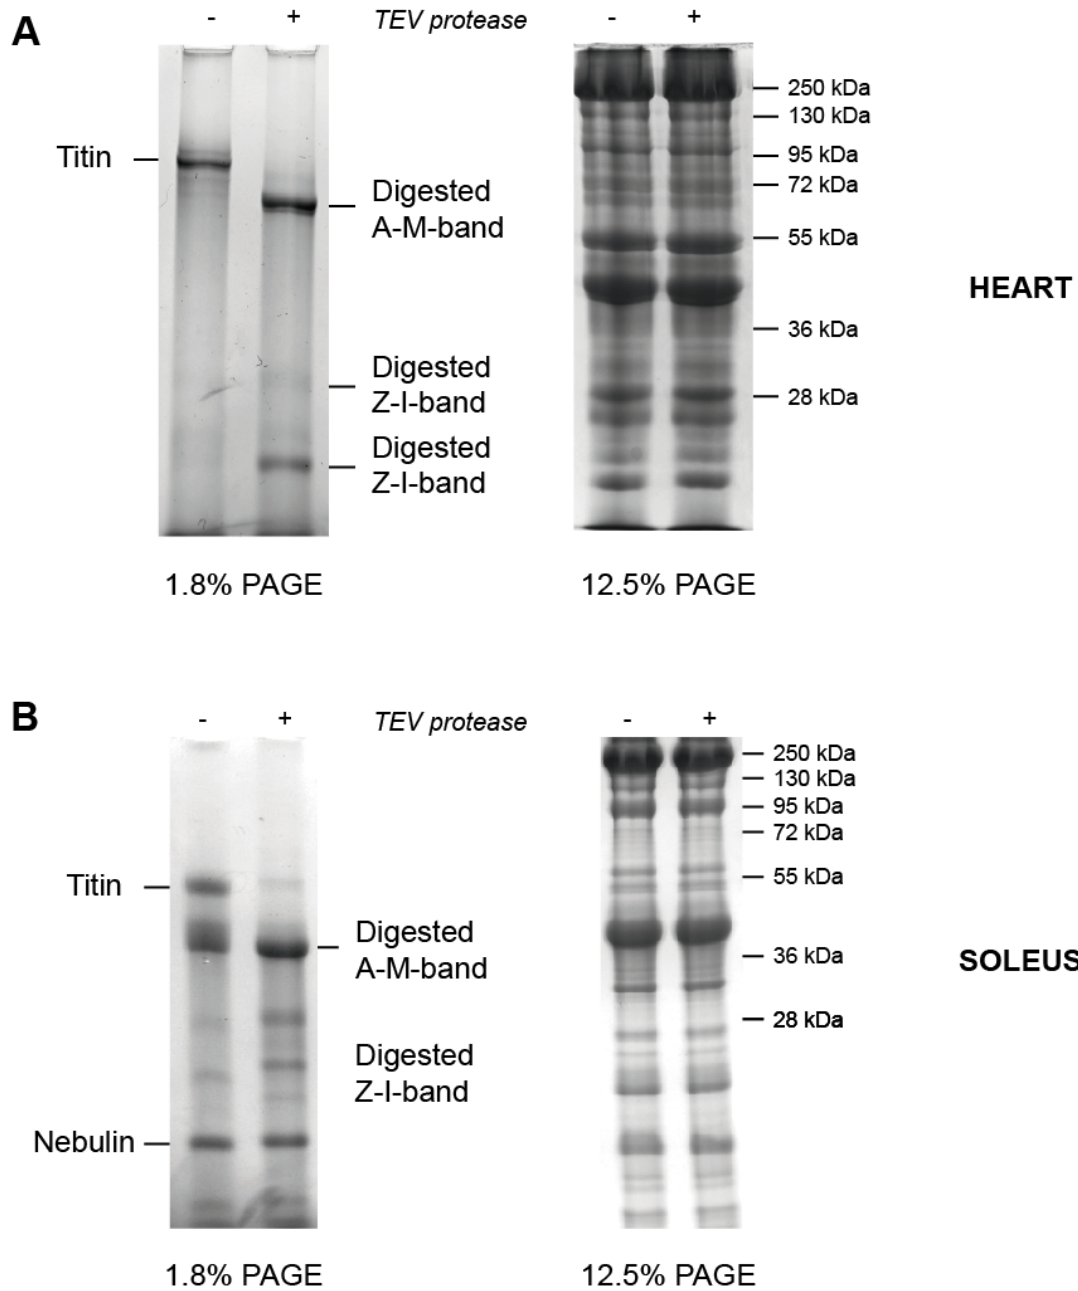

1  
2 **Supplementary Figure S6. Effect of TEV treatment on the protein composition of striated**  
3 **muscle from homozygous HaloTag-TEV titin mice. (A) Left:** 1.8% SDS-PAGE shows TEV-  
4 induced specific digestion of cardiac titin. *Right:* the pattern of protein bands in 12.5% SDS-  
5 PAGE gels remains unaffected by TEV treatment. **(B)** Equivalent results are obtained with  
6 soleus samples. In this particular experiment, specific assignment of Z-I-band fragments is  
7 hindered by some non-specific degradation of titin already present in the -TEV sample.

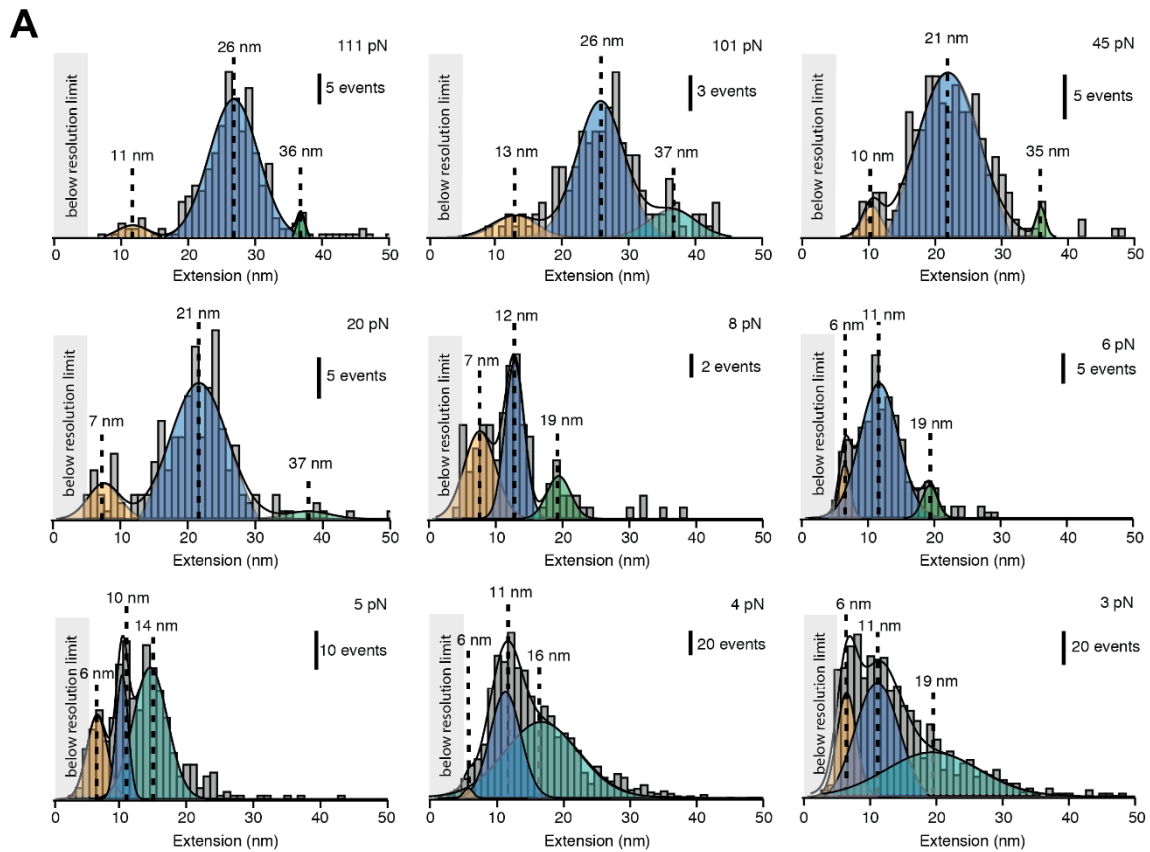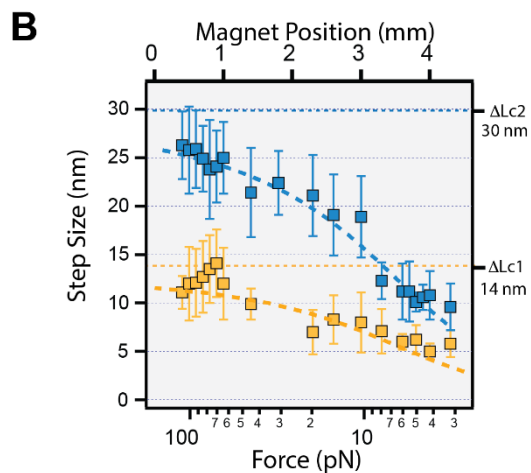

1

2 **Supplementary Figure S7. (Un)folding step sizes.** (A) Single titin molecules extracted from  
 3 gastrocnemius muscles were pulled at different forces between 3 and 111 pN, and the size of the  
 4 unfolding and refolding events was measured. We found three main populations of step sizes  
 5 (solid lines are Gaussian fits to the data). (B) Force-dependency of the step sizes for the two  
 6 populations corresponding to single-domain unfolding events, and fits to the worm like chain  
 7 model of polymer elasticity (dashed lines). We obtain  $\Delta L_C = 30 \pm 1$  nm (blue) and  $\Delta L_C = 14 \pm 1$   
 8 nm (yellow).

9



1 **Supplementary Text S1. Sequence of the targeting vector to introduce Halotag-TEV in**  
2 **titin.** Exons and Introns are shown in grey and white background, respectively.

3  
4 Exon224—Exon225—**TEV**—HaloTag—**EK**—NeoFRT—Exon226—Exon227—Exon228—  
5 Exon229—Exon230—Exon231—Exon232—Exon233—Exon234

6  
7 **Exon224**

8 GTGGTGACACGTT CAGAAGGAAGAGTTCACACGCTCACCC TGAGGGATGTGAAGCTAGAA  
9 GATGCTGGCGAAGTCCAAC TAACTGCAAAGGATTTCAAAC TCAGGCCAATCTCTTTGTG  
10 AAAG

11 gtaattagaaaacttattcctaaatacacacaatgaagacaatcacaacctctttat  
12 tgtgggagagtaccacagattattaaaatcaagtttccaaaagtctaatttttacat  
13 ggcataacaaaatgcagggttttttgtttttgtttttgttttaactataagcagt  
14 gtagtacatgcctttaaaccagcactcaggaggcagaggcaggtggatctctgtgag  
15 caaggtcagcctggtctacagagtgagttccaggacatgcagggccacacatagaa  
16 tctcagaaaagaaagacaaagggatggattaaaactaacatgggttttatactta  
17 tcttctgtctctgttttattattgtatttttactagttcctaagtacaactgctaaa  
18 aatgattaccagtcctatgttatgaatcatttttagccattatctttatgcttcat  
19 taattttctgtgaagctgcaatcagcagaggattgccacaagtttgaaccagcctg  
20 tacatagtgggtttccaggatagctaggaaaaggggaaaaaacaacaacaaacat  
21 agaacagtggtttattttcctctgtatataataatcaatgacaacacatcattgtg  
22 aaaacatctaagtgaaaaatagctttacaacaagcaactgagacagaagcagccc  
23 agatgccagagggaaatcagagaaagttctggaactcttggaaggaaacagcta  
24 gtatgattctttcag

25 **Exon225**

26 AACCCCGGTTGAGTTCAC TAAAGCCTCTTGAGGACCAGACGGT CGAAGAGGAGGCCACTG  
27 CAGTACTGGAGTGTGAAGTATCCAGAGAAAATGCCAAAGT GAAATGGTTCAA  
28 AATGGGA CAGAAATCCTCAAAGCAAGAAGTATGAAATCGTTGCTGATGGCAGGGT  
29 CAGGAAGCTCA TTATTCATGGTTGTACCC CAGAGGATATCAAACGTACACTTGT  
30 GATGCTAAAGATTTA AGACCTCCTGTAACCTGAATGTTGTTCTG

31 **HaloTag**

32  
33 GCTAGCGACAACACCACACCTGAG **GAGGACCTGTACTTCCAGAGC** GACAACACCACACCCGAGGCC  
34 GAAATCGGAACAGGCTTCCCTTTTCGACCCCCATTATGTGGAAGTGCTGGGCGAGAGGATG  
35 CACTACGTGGATGTTGGACCCAGGGATGGCACCCCTGTGCTGTTCC TGCATGGCAACCC  
36 ACCAGCAGCTACGTGTGGAGGAACATACCCCCATGTTGCTCCTACACATAGATGCATC  
37 GCTCCAGATCTGATTGGAATGGGAAAGAGCGATAAAACCTGATCTGGGATATTTTTTCGAT  
38 GACCATGTGAGATTTATGGATGCTTTTCATTGAAGCTCTGGGACTGGAAGAAGTGGTGC  
39 TGATTTCATGATTGGGGAAGCGCTCTGGGATTTTCATTGGGCTAAAAGAAAATCCTGAA  
40 AAGTGAAGGAATTGCTTTTATGGAATTCATCAGGCCTATCCCTACCTGGGACGAATGGCCA  
41 GAATTCGCCAGGGAGACCTTCCAGGCCCTCCGGACAACAGACGTGGGCAGAAAGCTGATC  
42 ATCGATCAGAACGTGTTTCATCGAGGGAACCC TGCCATGGGAGTGGTCAGGCCCTGACC  
43 GAGGTGGAGATGGACCACTATAGGGAGCCCTTCC TGAACCCGTTGACCGGGAGCCCTG  
44 TGGAGGTTCCCTAACGAGCTGCCATCGCCGGAGAGCCCGCAACATCGTGGCCCTGGTG  
45 GAGGAGTACATGGATTGGCTGCACCAGAGCCCTGTGCCAAGCTGCTGTTCTGGGCGACA  
46 CCCGGCGTGATCCCCCTGCCAAGCCGCTAGACTGGCTAAGAGCCTGCCAACCTGC  
47 AAAGCTGTGGACATCGGCCCTGGACTGAATCTGCTGCAGGAAGACAACCCCGACCTGATC  
48 GGCTCTGAGATCGCCAGGTGGCTGAGCACCC TGGAGATCAGCGGC GACAACACCACACC  
49 GAG **GACGACGACGACAAG** GACAACACCACCCCGAGACTCGAG

50 gtaagtattcctccacaggacttggcatttgaagtcattgtagccaaaacaaccaacac  
51 atgtaatgcatgcccctcttggcaactcacagatggatgctgacctaactgatacttc  
52 acacgtttctttacaaacatccttgtgctctgtctggccttggaaaagacaccaaccact  
53 ttttactacaccgctgcgctctttgtctgtatgtggttacaccactgtgtgactatcct  
54 gctagagatgaaaacaaaatgagtcacaaggagaagtagacaaccctgattccacttggga  
55 agataagtttcaggatcggaaaatatacaaaaaataagaatgaaaagttgtagaggaac  
56 atacttgagaacaactgggttatagtaacgacaatcacataatggaactgagagtaagg  
57 gtggacaagaagctgagtaagccaggatctttagtccctgattctttgaaatgaagaact  
58 ctgtcgttttttactatcacttcttccctagtgagagatgccctctctcagatgcc  
59 aactgctacctagctaatttgccttgccttttcttcttgcctcagaaaacattttttgc  
60 ggtccatttttgcagcgtttgtttggctctgttgcctctcatctgttgacaactaaaa  
61 cctagtggtttaaactgtgcttctggcttctgtactctgtcactccttccatgcttggg

1 cgctctactgtatcatcctgtagagtagccccttgggatttcttccccttgctgctctac  
2 ttctcttggagaaggctcagccgtggtggcttatcttctagccttccagctagcattgg

**NeoFRT**

3  
4 GAAGTTCTATACTTTCTAGAGAATAGGAACTTCGGAATAGGAACTTCAGTGGCTATGGCAGGGCTTGCC  
5 GCCCCGACGTTGGCTGCGAGCCCTGGGCCTTCACCCGAACCTGGGGGGTGGGGTGGGGAAAAGGAAGAAA  
6 CGCGGGCGTATTGGCCCAATGGGGTCTCGGTGGGGTATCGACAGAGTGCCAGCCCTGGGACCGAACCC  
7 GCGTTTATGAACAAACGACCCAACACCCGTGCGTTTTATTCTGTCTTTTTATTGCCGTCATAGCGCGGGT  
8 TCCTTCCGGTATTGTCTCCTTCCGTGTTTCAGTTAGCCTCCCCATCTCCCGTCAGAAGAACTCGTCAAG  
9 AAGGCGATAGAAGGCGATGCGCTGCGAATCGGGAGCGGCATACCGTAAAGCACGAGGAAGCGGTGAGCC  
10 CATTGCGCCCAAGCTTTCAGCAATATCACGGGTAGCCAACGCTATGTCTGATAGCGGTCCGCCACAC  
11 CCAGCCGGCCACAGTCGATGAATCCAGAAAAGCGGCCATTTTCCACCATGATATTCGGCAAGCAGGCATC  
12 GCCATGGGTACAGACGAGATCCTCGCCGTCGGGCATGCGCGCCTTGAGCCTGGCGAACAGTTCGGCTGGC  
13 GCGAGCCCCTGATGCTCTTCGTCCAGATCATCTGATCGACAAGACCGGCTTCCATCCGAGTACGTGCTC  
14 GCTCGATGCGATGTTTCGCTTGGTGGTTCGAATGGGCAGGTAGCCGGATCAAGCGTATGCAGCCGCCGAT  
15 TGCATCAGCCATGATGGATACTTCTCGGCAGGAGCAAGGTGAGATGACAGGAGATCCTGCCCCGGCACT  
16 TCGCCCAATAGCAGCAGTCCCTTCCCGCTTCAGTGACAACGTCGAGCACAGCTGCGCAAGGAACGCCCG  
17 TCGTGGCCAGCCACGATAGCCGCGCTGCCTCGTCTCAGTTCATTTCAGGGCACGGACAGGTTCGGTCTT  
18 GACAAAAAGAACCGGGCGCCCTGCGCTGACAGCCGGAACACGGCGGCATCAGAGCAGCCGATTGTCTGT  
19 TGTGCCAGTCATAGCCGAATAGCCTCTCCACCAAGCGCCGGAGAACCCTGCGTGCAATCCATCTTGTT  
20 CAATGGCCGATCCCATATTGGCTGCAAGGTGCGTTCGGTTCGAGGCCACACGCGTCACCTTAATATGCG  
21 AAGTGGACCTGGGACCGCGCCGCCCGACTGCATCTGCGTGTTCGAATTCGCCAATGACAAGACGCTGGG  
22 CGGGGTTTGCTCGACATTGGGTGGAAACATTCAGGCCCTGGGTGGAGAGGCTTTTTGCTTCTCTTGCAA  
23 AACCACACTGCTCGACATTGGGTGGAAACATTCAGGCCCTGGGTGGAGAGGCTTTTTGCTTCTCTTGcA  
24 AAACCACACTGCTCGCAATTCGAAGTTCCTATACTTTCTAGAGAATAGGAACTTCGGAATAGGAACTTC  
25

26 ttctcttggagaaggctcagccgtggtggcttatcttctagccttccagctagcattgg  
27 tctgagagcctccatgatcaagaagggttggcttggaaaggcttcttaaaaagctctgaa  
28 agatggaagggcgaggatgtggcttctccatcctgtacagcgccagacagatttcttggga  
29 gatgcatgaaccaacagatgtaaaagctgaatcagtgtcctatacagaacagagtttgtc  
30 acactagtacatgctgacttgcataatgaagtctttaaagctgagttaaaaatgaaaagc  
31 tggatatacatggttccaattagactcgtgctcgtagctatacataacttcaactatta  
32 tctttgaattctattgggtttacaatgatgtgtctttccttactagtgttccctttgaca  
33 aagaattatccttcaactctggtatagtacaaaacaagaaggcatttgcctctgtaat  
34 cattcaaaaagaactgaaatgggtcccaatttgaagaactaagttggttagcagagtaaga  
35 tataatcgaagagaactagaaagagaacaagagcaagcattattcccattggaagctgc  
36 aaaggttttcaaagctcagtggcagtttatcaagacaagcacaacagaacatgacttga  
37 tcttagcaccagaggacagggcagtttggctctctgagttcaaaaccagcctggtctac  
38 agagtgagttccaggacagccagggctacagagaggaaactctgtcttggagaagacaa  
39 agaaaatcatcttttcttattgtataccaagaaatattgggataaatttgcagaagcct  
40 catttgaattccaacattattctcttacag

**Exon226**

41  
42 [CTCCTCATGTGGAATTCCTAAGACCACTCACAGACCTCCAAGTCAAAGAAAAAGAACTG](#)  
43 [CTCGGTTTCGAGTGCAGAAATTTCCAAAGAAAATGAGAAG](#)

44 gtctgtaacaacataagtgtaattaatattagtaagctgattatcagtttgctttggt  
45 tactattgacaaaatgcaaggaaagaagaactagtaagcctttctgacttccatttt  
46 agattaaatttatgctagtattaaagacagacagatgtaattggtctcttttagtgccact  
47 cattaactgtctcataaaatttggactcaagatatttattattgtgctggagagatggctc  
48 agcgggttaagaacactgattgctcttccagaggccctgagttcaattcccagcctccaca  
49 tgggtggtcacaaccatctgtaattggggtctgatgcctcttctggtgtgtctgaagaga  
50 gcaatagtatactcatatacataaaaataattaataaatcttttttaaaaaagatatttg  
51 ttattttgagtcacatggaattgatgttttcttagattaaaaaaaagtcaaatagtagt  
52 aattctatgtctcagctaagtagttctgggtgccacaaactattattgccaaacagactt  
53 tctgtttacatcagtgagatggtttgtgtgatatctaaggcccccttaaacacaaaact  
54 tgcataacctcatcatttgttttccataattggaagaatatcacagtagatcaactttg  
55 ttcttgatttttaaatttttattcatttttctatcttctttatacatactttataca  
56 tacatataatatttatagccctcttttaataataactataatgtcttatgattgatttaa  
57 aaggacccttgggatactagttcatgtcatggatactgtgtaaggaacaacatgaaaac  
58 tgattttaagaaatctatttgtcttaaaatagat

**Exon227**

59  
60 [GTTTCAGTGGTTTAAAGATGGTGTGCTGAAATTA AAAAGGGCAAAAAGTATGACATCATTTCT](#)  
61 [AAGGAGCAGTACGAATTCCTGTCTATCAACAAAATGTCTACTGAATGATGAAGCAGAATAT](#)

1 TCCTGTGAAGTGAGGACAGCAAGAACTTCCGGCATGCTGACAGTCC TAG  
2 gtgaatgtgaaggcttttcttttactaagcatactagtcaggaacccaacttccagttt  
3 actgactgcatctcggttcttttctgcag

4 **Exon228**

5 AAGAAGAAGCTGTCTTCACAAAAAATCTTGCCAACCTTGAAGTTAGTGAAGGAGACACTA  
6 TCAAACTGGTGTGTGAAGTCTCCAAGCCTGGGGCAGAAGTGATTTGGTACAAAGGGGATG  
7 AGGAGATCATCGAAACAGGGAGATTTGAAATACCTTACTGATGGAAGGAAGAGAATCTTGA  
8 TCATTAGAATGCGCAGCTTGAGGATGCAGGCAGCTACAACGTGCGACTCCCAAGTTCTC  
9 GAACGGACAGCAAAGTCAAAGTACACG  
10 gtatgaaatctcagtggaagggcattttcttttcatccattcttgtcgtattaagata  
11 caaatgcccgatggttttctactgtcttccaactttttctttccag

12 **Exon229**

13 AACTTGCTGCTGAGTTCATCTCGAAGCCTCAAAACCTTGAATTTCTTGAAGGAGAAAAGG  
14 CTGAGTTTGTCTGCACTATCTCAAAGGAAAGCTTCGAAGTTCAGTGAAGAGGGGATGATC  
15 AGACACTTGAATCTGGAGATAAATATGACATCATTGCTGATGGCAAAAAGAGAGTCTTAG  
16 TTGTAAAGGATGCCACATTACAAGACATGGGCACCTACGTAGTCATGGTTGGGGCTGCCA  
17 GAGCCGACGCTCACCTGACAGTCATTG  
18 gtaagtttgtccttgcctccctgcaggcttaaatctgtagttttgatccttcatcatact  
19 acaaagtcttttgattgtttacag

20 **Exon230**

21 AAAAACTCAGGATCATAGTTCCCTCTTAAGGACACCAAGGTGAAGGAACAACAAGAGGTTG  
22 TCTTCAACTGCGAAGTCAATACTGAAGGTGCCAAAGCCAAATGGTTCAGAAATGAAGAAG  
23 CCATATTTGATAGTTCAAAAATACATCATTCTCCAAAAGACCTGGTCTACACCCTCAGAA  
24 TCAGAGATGCACGGTTAGATGACCAAGCCAACCTTAATGTGTCTTTGACCAATCACAGAG  
25 GTGAAAATGTTAAAAGTGCAGCCAATCTAATAGTGGAAG  
26 gtatgtgacatacatgacactagagaattttcccgcagcaatttatattatgcccgacaa  
27 ctaaattcaacctgtttttctcgcagcaccacag

28 **Exon231**

29 AGGAAGATCTTAGGATTGTTGAACCTCTTAAAGATATTGAAACAATGGAGAAGAAGTCAG  
30 TCACATTCTGGTGCAAGGTGAATCGTCTCAATGTGACACTGAAGTGGACCAAAAATGGAG  
31 AAGAAGTGGCTTTTGACAACCGTATATCATACCGAATTGATAAGTACAAACACTCTCTAA  
32 TCATCAAGGACTGTGGCTTCCCAGATGAAGGTGAATACGTCGTCACTGCTGGGCAAGATA  
33 AATCCGTGGCAGAGCTGCTCATCATAGAAGCCCCAACAGAATTCGTGGAGCACCTGGAAG  
34 ACCAGACGGTCACAGAGTTTATGACGCTGTCTTCTCCTGCCAGCTCTCCAGAGAGAAAG  
35 CGAATGTA AAAATGTTACAGAAATGGAAGAGAAATCAAGGAAGGCAAAA  
36 gtacgcaaaacgtgtctgcctccctctgttgttctgtgtgtactttgacatcagacatt  
37 tgcctaatactcatgctacaagctaactaatcattcaatctcttctttag

38 **Exon232**

39 ATACAAGTTTGAAGAGGATGGGAGCATCCACAGGCTCATCATAAAAGACTGCAGGCTGGA  
40 GGATGAGTGTGAATACGCTTGTGGTGTAGAGGACCGCAAGTCCCAGCTAGACTTTTTGT  
41 AGAAG  
42 gttagttattggcttcaaggataattctagctgaagtgacaatctttttacaatgctaata  
43 aaaaatacaaacacatatctgtttttatttttacattttctctccag

44 **Exon233**

45 AAATTCAGTTGAGATTATCAGGCCCTCTCAAGACATTTCTTGAAGCCCCCTGGTGCAGACG  
46 TTATCTTCTTGGCTGAGCTCAACAAAGATAAAAGTGGAGGTCCAATGGCTTAGAAATAACA  
47 TGATCGTCGTCCAGGGTGACAAGCACCCAGATGATGAGTGAAGGAAAGATACACAGGCTAC  
48 AGATTTGTGATATTAAGCCACGTGACCAGGGCGAATACAGATTCATTGCCAAAGATAAAG  
49 AAGCCAGGGCTAAACTTGAATTAGCAG  
50 gtaaatgtctttcttctgcttctctgggtgtcctccccatatacaaacctctgtagatttg  
51 agattttacaattaaggcaaaacactccttgtgaaagcatatggctcgaacctgtgctca  
52 cgtgttagctattctactttgtctacctacaaagtgggaagtggtgagcagcatctttaca  
53 tgtcaaaccactgttattcctggcatgggcagctgctcatgacttcttagaagagttcct  
54 cactcaactgataggcaactcctgtggctcttttaaatatgaaacctgcataggtttccc  
55 cccaaagccccattgtacatgagagaaagctgtctgacttatcctgaactaagtatgcag  
56 gactttatcaaaaaacatattttataaaataatttcaacaagaaaagcaaaacttgtttca  
57 ccatattctaggtcctctgcaattatttttaaactaagaccagatgtgaatgatggatgc  
58 catcttcaccaaaccactgtttccaaacatgaatagttaggagtaaaacaataacaaca  
59 caacaagctattataactctccaacagaatgcactgctatgaaactactgtggttatgat  
60 aatactgtggtttatcaaatgtatagaaaaaaaacctatgtcatagtatgactatagta  
61 tataactcaaacatgtttgtgtgttctctttgtcactag

1  
2  
3  
4  
5  
6  
7

**Exon234**

```
CTGCACCTAAAATCAAGACAGCTGATCAAGATCTCGTCGTTGATGCTGGCCAGCCTCTGA  
CAATGGTGGTACCCTATGATGCCTACCCCAAAGCAGAAGCTGAATGGTTTAAAGAGAACG  
AACCTCTATCTACAAAAACCGTTGACACTACGGCTGAGCAGACTTCTTTCAGAATCTCAG  
AAGCCAAGAAGGACGACAAGGGGAGGTATAAAATCGTGCTTCAGAACAAGCATGGGAAAG  
CAGAGGGCTTCATCAATTTACAAGTTATTG
```

1 **Supplementary Text S2. Sequence of the I86-HaloTag-TEV-I87 recombinant construct.**  
2 The QS peptide bond cleaved by TEV is indicated. Please note that DNA sequence do not  
3 match the murine DNA because it was codon-optimized for optimal protein expression in  
4 *E.coli*.

6 I86-TEV site-Halotag-EK site-I87

7 **cDNA:**

8 ATGAGAGGATCGCATCACCATCACCATCACGGATCCCTCCGGTTGAATTTACCAAACCGCTGG  
9 AAGATCAGACCGTTGAAGAAGAAGCAACCGCAGTTCTGGAATGTGAAGTTAGCCGTGAAAATGC  
10 CAAAGTGAAATGGTTTTAAAAACGGCACCGAAATCCTGAAAAGCAAGAAATATGAAATTGTGGCC  
11 GATGGTCGTGTGCGCAAACCTGATTATTCATGGTTGTACACCGGAAGATATCAAGACCTATACCT  
12 GTGATGCCAAAGATTTCAAACAGCTGCAATCTGAATGTTGTTCTGGCAAGCGATAATACCAC  
13 TCCGGAA **GAGGATCTGTATTTTCAGAGT** GATAATACAACCCCTGAA **GCAGAAATCGGTACTGGC**  
14 **TTTCCATTCGACCCCATTTATGTGGAAGTCTGGGCGAGCGCATGCACTACGTGATGTTGGTC**  
15 **CGCGCGATGGCACCCCTGTGCTGTTCTGCACGGTAACCCGACCTCCTCCTACGTGTGGCGCAA**  
16 **CATCATCCCGCATGTTGCACCGACCCATCGCTGCATTGCTCCAGACCTGATCGGTATGGGCAA**  
17 **TCCGACAAACCAGACCTGGGTTATTTCTTCGACGACCACGTCGGCTTCATGGATGCCTTCATCG**  
18 **AAGCCCTGGGTCTGGAAGAGGTGTCCTGGTCAATCACGACTGGGGCTCCGCTCTGGGTTTTCCA**  
19 **CTGGGCCAAGCGCAATCCAGAGCGCGTCAAAGGTATTGCATTTATGGAGTTCATCCGCCCTATC**  
20 **CCGACCTGGGACGAATGGCCAGAATTTGCCCGGAGACCTTCCAGGCCTCCGCACCACCGACG**  
21 **TCGGCCGCAAGCTGATCATCGATCAGAACGTTTTTATCGAGGGTACGCTGCCGATGGGTGTCGT**  
22 **CCGCCCCTGACTGAAGTCGAGATGGACCATTACCGCGAGCCGTTCTGAATCCTGTTGACCGC**  
23 **GAGCCACTGTGGCGCTTCCCAAACGAGCTGCCAATCGCCGGTGAGCCAGCGAACATCGTCGCGC**  
24 **TGGTCGAAGAATACATGGACTGGCTGCACCACTCCCTGTCCCGAAGCTGCTGTTCTGGGGCAC**  
25 **CCCAGGCGTTCTGATCCCACCGCCGAAGCCGCTCGCTGGCCAAAAGCCTGCCTAACTGCAAG**  
26 **GCTGTGGACATCGGCCCGGGTCTGAATCTGCTGCAAGAAGACAACCCGGACCTGATCGGCAGCG**  
27 **AGATCGCGCGCTGGCTGTGACGCTCGAGATTTCCGGCGATAACACGACACCTGAAGATGATGA**  
28 **TGATAAAGACAATACGACACCGGAAACACGTGCACCGCATGTGGAATTTCTGCGTCCGCTGACC**  
29 **GATCTGCAGGTAAAGAAAAAGAAACCGCACGTTTTGAATGCGAGATCAGCAAAGAAAATGAAA**  
30 **AGGTGCAGTGGTTTTAAGATGGTGCCGAAATCAAAAAGGCAAAAATACGACATCATCTCCAA**  
31 **AGGTGCCGTTTCGTATTCTGGTTATTAACAAATGTCTGCTGAACGATGAAGCCGAATATAGCTGT**  
32 **GAAGTTCGTACCGCACGTACCAGCGGTATGCTGACCAGATCTTAA**

33 **Protein:**

34 MRGSHHHHHHGS PPVEFTKPLEDQTVEEEEATAVLECEVSRENAKVKWFKNGTEILKSKKYEIVA  
35 DGRVRKLI IHGCTPEDIKTYTCDAKDFKTSNCLNVV LASDNTTPE **EDLYFQ'** SDNTTPEAEIGT  
36 GPFDPHYVEVLGERMHYVDVGP RDGTPVLF L HGNPTSSYVWRNI IPHVAPTHR CIAPDLIGMG  
37 KSDKPDLGYFFDDHVR FMDAFIEALGLEEVV LVIHDWGSALGFHWAKRNP ERVKGIAFMEFIRP  
38 IPTWDEWPEFARET FQAFRTTDVGRKLI IDQNVFIEGTLPMGVVRPLTEVEMDHYREPFLNPVD  
39 REPLWRFPNELPIAGEPANIVALVEEYMDWLHQSPVPKLLFWGTPGVLI PPAAEARLAKSLPNC  
40 KAVDIGPGLNLLQEDNPD LIGSEIARWLSTLEISGDNTTPE **DDDDK** DNTTPE **TRAPHVEFLRPL**  
41 **TDLQVKEKETARFECEISKENEKVQWFKDGAIEIKKGKKYDIISKGAVRILVINKLLNDEAEYS**  
42 **CEVRTARTSGMLTRS**

43

- 1 **Supplementary Video S1. 3D reconstruction of HaloTag-TEV clarified muscle fibers.**
- 2 Following specific labeling of gastrocnemius muscle with Oregon Green Halo ligand, fixation
- 3 and clarification, a 250- $\mu\text{m}$ -deep Z-stack was obtained using multiphoton microscopy (127
- 4 images). Individual images were intensity corrected and the software Imaris was used to
- 5 produce the 3D animation.
